1 **JASPer controls interphase histone H3S10 phosphorylation by**  
2 **chromosomal kinase JIL-1 in *Drosophila***

3

4 Christian Albig<sup>1,2</sup>, Chao Wang<sup>3</sup>, Geoffrey P. Dann<sup>4,5</sup>, Felix Wojcik<sup>4</sup>, Tamás Schauer<sup>6</sup>, Silke  
5 Krause<sup>1</sup>, Sylvain Maenner<sup>1,7</sup>, Weili Cai<sup>3</sup>, Yeran Li<sup>3</sup>, Jack Girton<sup>3</sup>, Tom W. Muir<sup>4</sup>, Jørgen  
6 Johansen<sup>3</sup>, Kristen M. Johansen<sup>3</sup>, Peter B. Becker<sup>1,\*</sup> and Catherine Regnard<sup>1,\*</sup>

7

8 <sup>1</sup>Molecular Biology Division, Biomedical Center, Faculty of Medicine and Center for  
9 Integrated Protein Science Munich (CIPSM), Ludwig-Maximilians-University of Munich,  
10 82152 Martinsried, Germany;

11 <sup>2</sup>Graduate School for Quantitative Biosciences (QBM), Ludwig-Maximilians-University of  
12 Munich, 81377 Munich, Germany;

13 <sup>3</sup>Roy J. Carver Department of Biochemistry, Biophysics, and Molecular Biology, Iowa State  
14 University, Ames, Iowa, 50011, USA;

15 <sup>4</sup>Department of Chemistry, Princeton University, Frick Laboratory, Princeton, New Jersey,  
16 08544, USA;

17 <sup>5</sup>Current address: Department of Biochemistry and Biophysics, Perelman School of  
18 Medicine, University of Pennsylvania, Philadelphia, Pennsylvania, 19104, USA;

19 <sup>6</sup>Bioinformatics Unit, Biomedical Center, Faculty of Medicine, Ludwig-Maximilians-University  
20 of Munich, 82152 Martinsried, Germany;

21 <sup>7</sup>Current address: UMR7365 CNRS-UL, IMoPA, University of Lorraine, 54505 Vandoeuvre-  
22 les Nancy, France;

23

24

25 \*Corresponding authors: Peter B. Becker and Catherine Regnard, E-Mails:  
26 pbecker@bmc.med.lmu.de, cregnard@bmc.med.lmu.de; Phone: +49 (0)89218071602; Fax:  
27 +49 (0)89218075425.

28

29

30 Running title: JASPer controls chromosomal kinase JIL-1 at active chromatin

## 31 **Abstract**

32 In flies, the chromosomal kinase JIL-1 is responsible for most interphase histone H3S10  
33 phosphorylation and has been proposed to protect active chromatin from acquiring  
34 heterochromatic marks, like dimethylated histone H3K9 (H3K9me2) and HP1. Here, we show  
35 that JIL-1's targeting to chromatin depends on a new PWWP domain-containing protein  
36 JASPer (JIL-1 Anchoring and Stabilizing Protein). The JASPer-JIL-1 (JJ)-complex is the  
37 major form of the kinase *in vivo* and is targeted to active genes and telomeric transposons  
38 via binding of the PWWP domain of JASPer to H3K36me3 nucleosomes. Put in place, the  
39 complex modulates the transcriptional output. JIL-1 and JJ-complex depletion in cycling cells  
40 lead to small changes in H3K9me2 distribution at active genes and telomeric transposons.  
41 Finally, we identified many new interactors of the endogenous JJ-complex and propose that  
42 JIL-1 not only prevents heterochromatin formation, but also coordinates chromatin-based  
43 regulation in the transcribed part of the genome.

44 Key Words: PWWP domain / histone phosphorylation / COMPASS / heterochromatin / BOD1  
45 / Dpy-30L1 / Telomeres

46

## 47 **Main text**

48 In mammals, several nuclear kinases contribute to phosphorylation of histone H3 at serine  
49 10 (H3S10ph) in interphase, whereas in *Drosophila melanogaster*, the essential kinase JIL-1  
50 is responsible for most of it<sup>1</sup>. The significance of interphase H3S10ph is often  
51 underestimated because most H3S10 phosphorylation in asynchronous cell populations  
52 stems from mitotic chromatin, where it is deployed by Aurora kinase B<sup>2,3</sup>. Originally,  
53 interphase H3S10ph has been associated, in combination with H3K9ac and H3K14ac, with  
54 transcriptional activation of immediate early genes upon MAPK activation<sup>4,5</sup>. In *Drosophila*,  
55 interphase H3S10ph is enriched at the body of active genes<sup>6</sup>. In mammal, in the extreme  
56 case of mouse embryonic stem cells (mESC), ~30% of the genome is enriched for H3S10ph  
57 in interphase<sup>7</sup>.

58 The current model is that JIL-1 protects euchromatin from heterochromatization<sup>8</sup>. According  
59 to the phospho-methyl switch model for mitotic H3S10ph<sup>9</sup>, placing H3S10ph prevents H3K9  
60 methylation and subsequent binding of heterochromatin components. JIL-1 phosphorylates  
61 various H3 peptides with different methylation states, including H3K9me2/3, with a  
62 comparable efficiency<sup>6</sup>, whereas histone methyltransferases of the Su(var)3-9 family are  
63 inhibited by H3S10ph<sup>10,11</sup>. Several observations suggest that JIL-1 is important for the  
64 balance between eu- and heterochromatin. The Su(var)3-1 alleles of JIL-1 gene, which lead  
65 to the expression of JIL-1 truncated in its C-terminal domain (CTD), result in reduced

66 heterochromatin spreading at euchromatin-heterochromatin boundaries<sup>12,13</sup>. Conversely, in  
67 the JIL-1<sup>z2/z2</sup> null mutant, heterochromatin components spread into euchromatin. The  
68 spreading of H3K9me2 and HP1 is highest on the euchromatic part of the X chromosome in  
69 both sexes<sup>14</sup>, the spreading of the 7-zinc-finger protein Su(var)3-7 affects euchromatin  
70 similarly on all chromosomes<sup>15</sup>. In addition, JIL-1 phosphorylates Su(var)3-9<sup>16</sup>, the histone  
71 methyl transferase responsible for H3K9me2/3, suggesting a possible function for JIL-1 at  
72 constitutive heterochromatin.

73 JIL-1 may also play a role at telomeres, which combine features of heterochromatin and  
74 euchromatin in *Drosophila*. JIL-1 localizes to arrays composed of the three non-LTR  
75 retrotransposons HeT-A, TART and TAHRE (HTT) on polytene chromosomes in mutants  
76 with elongated telomeres<sup>17</sup>. Transcription of HTT arrays is essential for telomere  
77 maintenance in flies, and JIL-1 is a positive regulator of retrotransposon transcription<sup>18,19</sup>.

78 At the low resolution of polytene chromosomes, JIL-1 localizes to active chromatin and is  
79 enriched on the male dosage-compensated X chromosome<sup>20</sup>. When the binding of JIL-1 to  
80 chromatin was studied at higher resolution using chromatin-immunoprecipitation (ChIP),  
81 conflicting results were obtained. Our early ChIP-chip study suggested that JIL-1 is found on  
82 all transcribed gene bodies and is enriched on X-chromosomal genes in male S2 cells<sup>6</sup>.  
83 ChIP-seq experiments from female Kc cells<sup>21</sup> and salivary glands<sup>8</sup> suggested that JIL-1  
84 associates to the 5' end/promoters of active genes and to enhancers.

85 In this work, we show that the JIL-1 protein level is tightly controlled by JASPer (JIL-1  
86 Anchoring and Stabilizing Protein), a novel PWWP domain-containing protein. Both proteins  
87 form a stable JASPer-JIL-1 (JJ)-complex, the functional form of the kinase *in vivo*. The  
88 PWWP domain of JASPer tethers the JJ-complex to H3K36me3 nucleosomes *in vitro*.  
89 Consistently, the JJ-complex is targeted to H3K36me3 chromatin at active gene bodies and  
90 at telomeric transposons *in vivo*. Depletion of the JJ-complex in flies induces  
91 heterochromatin spreading in salivary gland nuclei as described for the JIL-1 deficiency.  
92 Using *D. melanogaster* cell lines, we show that depletion of JIL-1 or the JJ-complex  
93 modulates the transcriptional output. In male S2 cells, depletion of JIL-1 results in a modest  
94 enrichment of H3K9me2 in the active chromatin, where the JJ-complex binds. Finally, we  
95 identified various known and novel interactors of the endogenous JJ-complex, notably  
96 chromatin remodeling complexes and subunits of the Set1/COMPASS complex. We propose  
97 that JIL-1 regulates interphase chromatin structure and function through H3S10  
98 phosphorylation in collaboration with other enzymes.

99

100

## 101 Results

### 102 JIL-1 kinase forms a complex with the PWWP domain containing protein JASPer

103 Since JIL-1 lacks a known chromatin binding domain, we hypothesized that JIL-1 is recruited  
104 to chromatin by an interaction partner. To identify such a protein, we used nuclear extracts of  
105 *D. melanogaster* embryos to perform preparative immunoprecipitations using antibodies  
106 against JIL-1. A protein of ~60 kDa co-purified with JIL-1 using two different JIL-1 antibodies  
107 (Supplementary Fig.1a). Mass spectrometry analysis identified the protein as encoded by the  
108 gene CG7946 on chromosome 3R. We named this protein 'JIL-1 Anchoring and Stabilizing  
109 Protein' (JASPer). Consistently, reverse IP's using antibodies against JASPer showed that  
110 JIL-1 was efficiently co-immunoprecipitated from embryo extracts and with similar efficiency  
111 (Fig.1a). Coexpressing recombinant FLAG-JIL-1 and untagged JASPer<sup>22</sup> yielded a stable  
112 complex (Fig.1b). Coomassie-blue staining suggested a roughly equal stoichiometry for the  
113 recombinant and the endogenous complex (Fig.1b, Supplementary Fig.1a) (corresponding to  
114 a mass ratio of 2.6:1 at calculated molecular weights of 137 kDa for JIL-1 and 53 kDa for  
115 JASPer).

116 JASPer is a well-conserved protein between *Drosophila* species. It has an N-terminal PWWP  
117 domain and a C-terminal LEDGF/IBD domain (Fig.1c, Supplementary Figs.2a-b). This  
118 PWWP-LEDGF domain architecture is found in 94 eukaryotic proteins, with mostly unknown  
119 functions, except for the PSIP1/LEDGF chromatin adaptor protein, which has pleiotropic  
120 functions in HIV infection and cancer development<sup>23,24</sup>. JIL-1 is also well conserved among  
121 distant *Drosophila* species (Supplementary Fig.3), particularly in the N-terminal AGC kinase  
122 domain<sup>25</sup>, the C-terminal MAPK-related domain and its CTD. The CTD is rich in proline  
123 (11%) and arginine (9%) residues and most probably intrinsically disordered. Sequence  
124 comparison revealed a prion-like domain (PrID)<sup>26</sup> and putative PEST sequences<sup>27</sup>, which  
125 most probably relate to lower stability of the protein because of their intrinsic disorder<sup>28</sup>.

126 Using a LacO-LacI targeting system in flies, we found that LacI-JIL-1 full-length and LacI-JIL-  
127 1-CTD recruited endogenous JASPer to the LacO arrays, but JIL-1- $\Delta$ CTD did not  
128 (Supplementary Fig.1c). We further mapped the interaction by co-expression and co-  
129 purification of various derivatives. Truncations in the CTD of JIL-1 were designed according  
130 to sequence conservation in *Drosophilae* JIL-1 homologs (Fig.1c and Supplementary Fig.3).  
131 Expression of the C-terminal deletion mutants of FLAG-JIL-1 (mutants a-g) with untagged,  
132 full-length JASPer showed that the minimal JASPer binding domain (JBD) encompasses 44  
133 amino acids (982-1025) between the truncations c and d of the CTD (Fig.1d). The JBD is rich  
134 in proline (22%), glutamic acid (16%) and aromatic residues tyrosine/phenylalanine (16%).  
135 Furthermore, it contains a stretch of 7 conserved amino acids, DFxGFDE, matching the  
136 consensus motif (FxGF) found in proteins interacting with the LEDGF/IBD domain of

137 PSIP1<sup>29</sup>. Indeed, using various JASPer derivatives (Fig.1c) co-expressing with full-length  
138 FLAG-JIL-1, we found that the deletion of the 120 amino acids long LEDGF domain in the C-  
139 terminal half of JASPer ( $\Delta$ LEDGF) was sufficient to abrogate binding to JIL-1 (Fig.1e). This  
140 domain contains a high proportion of charged residues (glutamic acid/aspartic acid: 18% and  
141 arginine/lysine residues: 17%).

142

### 143 **JASPer stabilizes JIL-1 *in vivo***

144 To understand the function of JASPer in the JJ-complex, we generated the JASPer<sup>cw2</sup> null  
145 allele by imprecise excision of the P-element in an appropriate EP line. The deletion  
146 encompassed the coding region of both described transcripts (Fig.2a). Analysis of the  
147 salivary glands of homozygous JASPer<sup>cw2/cw2</sup> mutants showed that JASPer was not  
148 detectable by Western blot (and on chromosome spreads (Fig.2b,c). Remarkably, JIL-1 was  
149 also not detectable in the absence of JASPer. To confirm the decrease of JIL-1, we looked at  
150 the diagnostic H3S10ph mark, which is also lost in this post-mitotic tissue (Fig.2d). As also  
151 described for the JIL-1<sup>z2/z2</sup> hypomorph mutant<sup>14</sup>, global H3K9me2 levels were unchanged  
152 (Fig.2b) but the mark redistributed from the chromocenter to the euchromatic chromosomal  
153 arms, in particular of the X chromosome (Fig.2d). Although the JASPer<sup>cw2/cw2</sup> mutant mostly  
154 phenocopies the JIL-1<sup>z2/z2</sup> mutant, the polytene chromosomes retain their characteristic  
155 banded pattern (Figs.2c,d), which are lost in the JIL-1<sup>z2/z2</sup> mutant<sup>30</sup>. This observation is  
156 consistent with the partial lethality of the JASPer<sup>cw2/cw2</sup> mutant (54% of expected survival,  
157 n=1496) as compared to the lethal JIL-1<sup>z2/z2</sup> mutant. Ablation of JASPer by RNA interference  
158 in cultured cells also led to loss of JIL-1 (Fig.2e). JIL-1 was depleted to the same level by  
159 RNAi against *jil-1* or *jasper* in S2 and Kc cells, suggesting that JIL-1 is unstable in the  
160 absence of JASPer. The JIL-1 transcript level was unchanged upon *jasper* RNAi in our RNA-  
161 seq experiments, excluding regulation at the transcription level (Fig.2f).

162

### 163 **JASPer binds nucleic acids and recruits the JJ-complex to H3K36me3 nucleosomes** 164 ***in vitro***

165 In addition to the LEDGF JIL-1-binding domain, JASPer harbors a PWWP domain at its N-  
166 terminus (Fig.1c). PWWP domains have a positively charged surface favoring DNA binding  
167 and an aromatic pocket for methyl-lysine binding [for review<sup>31</sup>]. Conceivably, this domain is  
168 responsible for the recruitment of the JJ-complex to chromatin. As expected, recombinant  
169 JASPer had significant affinity for DNA in electrophoretic mobility shift assays (EMSA), while  
170 JIL-1 showed no detectable binding under the same conditions (Supplementary Fig.4a). A 9-  
171 fold molar excess of JASPer shifted all DNA molecules. Apparently, several JASPer  
172 molecules can bind simultaneously one DNA molecule as at least three retarded bands

173 appeared in the EMSA and the most retarded ones correlated with higher JASPer  
174 concentration. JASPer also bound a 123 nucleotide long RNA hairpin<sup>32</sup> in a dose-dependent  
175 manner (Supplementary Fig.4b).

176 To decipher the binding specificity of JASPer and the JJ-complex for nucleosomes, we used  
177 a library of 115 different types of DNA-barcoded nucleosomes bearing different histone and  
178 DNA modifications<sup>33</sup>. Recombinant, FLAG-tagged JASPer or FLAG-tagged JJ-complex were  
179 coupled to  $\alpha$ -FLAG beads, incubated with the nucleosome library, washed and the pulled-  
180 down nucleosomes were quantified by sequencing of the associated indexes. The wild type  
181 JASPer showed high specificity towards nucleosomes bearing the single H3K36me3  
182 modification (Fig.3a). This modification was ~40-fold enriched in the IP relative to the  
183 unmodified nucleosome used for normalization. Mutation of two residues in the aromatic  
184 cage to alanines (Y23A and W26A) abolished specific H3K36me3 binding (Fig.3a). Similar  
185 results were obtained for the JJ-complex, where H3K36me3 was ~70-fold enriched over the  
186 unmodified nucleosome, only if the aromatic cage is intact (Fig.3b). In accordance with the  
187 DNA binding activity shown in EMSA (Supplementary Fig.4a), we found a ~3- to 9-fold  
188 enrichment of the two nucleosome-free DNAs used as controls in the library. The enrichment  
189 (~2- to 7-fold) of nucleosomes bearing acetylated H3 tails, could be due to their lower  
190 assembly efficiencies, as described<sup>33</sup>. Alternatively, it could reflect, at least in part, the better  
191 accessibility of the linker DNA in those nucleosomes, as acetylation of the H3 tail decreases  
192 its binding to the linker DNA<sup>34-36</sup>. Acetylation may thus favor linker DNA-dependent binding  
193 by JASPer, as shown for the PWWP domain of PWWP2A<sup>34</sup>. These results point towards a  
194 mostly ionic interaction between the overall positively charged JASPer (pI of 8.3) and the  
195 negatively charged sugar-phosphate backbone of the DNA as has been proposed for other  
196 PWWP domains to synergize with the aromatic cage for high-affinity binding of H3K36me3  
197 nucleosomes. The PWWP domain contacts both DNA gyres next to the H3 tail exit site  
198 through its basic surface and the aromatic cage engages with the K36me3 residue<sup>37,38</sup>.

199 JIL-1 is a potent kinase *in vitro* and phosphorylates isolated H3 peptide (amino acids 1-20) or  
200 full-length histone H3. However, the isolated kinase proved to be inactive on nucleosome  
201 arrays *in vitro* even at high molar ratios of kinase to nucleosome<sup>6</sup>. To explore whether the  
202 oriented binding of the JJ-complex to nucleosomes would favor phosphorylation, we used a  
203 semi-quantitative kinase assay based on Western blot detection of H3S10ph. Using  
204 H3K36me3-modified and unmodified nucleosomes and 12-mer nucleosome arrays  
205 (Supplementary Fig.4c,d), we confirmed that only the wild type JJ-complex phosphorylates  
206 H3S10, that the active site-mutated enzyme is inactive and that we could detect low amounts  
207 of H3S10ph by Western blot (Supplementary Fig.4e). For the kinase assay with  
208 nucleosomes, we had to load ~10-times more of each reaction to detect similar levels of  
209 H3S10ph as compared to a completely phosphorylated, isolated H3, indicating that the JJ-

210 complex is ~10-times less active on nucleosomes (Supplementary Fig.4f). However, our  
211 analysis showed that altogether JIL-1 in the JJ-complex is more active on nucleosome arrays  
212 (>3% of the phosphorylated H3 reference) than on mononucleosomes. This suggests that  
213 the binding to one nucleosome in the array may facilitate the phosphorylation of a  
214 neighboring nucleosome (Supplementary Fig.4f,g). The fact that we did not observe a  
215 preference for the H3K36me3 nucleosomes is probably due to the high concentration of JJ-  
216 complex used in the kinase assay to allow H3S10ph detection by Western blot.

217

### 218 **The JJ-complex localizes to active chromatin *in vivo* and its enrichment on the male X** 219 **chromosome depends on JIL-1 and dosage compensation**

220 Because the JJ-complex specifically selects H3K36me3 nucleosomes via the PWWP of  
221 JASPer *in vitro*, we wished to confirm this interaction *in vivo*. Recently, differing results about  
222 JIL-1 localization *in vivo* arose from data generated using different ChIP-chip/-seq  
223 approaches<sup>6,8,21</sup>, possibly due to different chromatin fragmentation protocols<sup>39</sup>. To clarify this  
224 issue, we used both chromatin digested with MNase and chromatin sheared by sonication to  
225 fragment chromatin for ChIPs of H3K36me3, JIL-1, JASPer and MSL3 in male S2 cells and  
226 in female Kc cells (Supplementary Fig.5a-c). Independent of the fragmentation strategy, we  
227 found that JIL-1 and JASPer binding profiles overlap with H3K36me3 at exons of active  
228 genes *in vivo* (Fig.3c, Supplementary Fig.6a-d), as expected<sup>40</sup>. Like JIL-1, JASPer is  
229 enriched at active genes on the X chromosome relative to autosomes only in male S2 cells  
230 (Fig.3d, Supplementary Fig.7a,b). We excluded that this enrichment is caused by  
231 normalization due to copy number differences by comparing the non-input-normalized  
232 coverages of H3K36me3, JASPer and JIL-1 to the input (Supplementary Fig.7c-e). In female  
233 Kc cells, we found similar coverage of H3K36me3 and JASPer at active genes on all  
234 chromosomes, whereas in male S2 cells the X chromosomal sequence coverage of  
235 H3K36me3 is roughly half of the autosomal one, as for the input. By contrast, the coverages  
236 of JASPer and JIL-1 on active X chromosomal and autosomal genes in male S2 cells are  
237 similar. Interestingly, the X-chromosomal enrichment of JASPer and JIL-1 is only observed in  
238 male cells (Fig.3d and Supplementary Fig.7a).

239 The active genes on the X chromosome in male cells are strongly acetylated at H4K16 by  
240 the DCC subunit MOF, which is thought to decompact the chromatin fiber<sup>41,42</sup>. This loosening  
241 of chromatin folding may allow JASPer to bind better to H3K36me3, independent of JIL-1. To  
242 test whether the X-chromosomal enrichment of JASPer depends on JIL-1, we analyzed  
243 JASPer, MSL3, H4K16ac and H3K9me2 distribution by ChIP-seq after *jil-1* RNAi in S2 cells  
244 (Fig.4a and Supplementary Fig.5d). To quantify the absolute difference in ChIP-seq  
245 coverage between conditions by spike-in normalization, we added 5% *D. virilis* cells to our

246 chromatin preparations<sup>43</sup>. Intriguingly, the X chromosome-specific enrichment of JASPer in  
247 male S2 cells was reduced to the autosomal level in absence of JIL-1, while the DCC subunit  
248 MSL3 was slightly redistributed, the diagnostic H4K16ac, set by the DCC, slightly dropped  
249 and the heterochromatin mark H3K9me2 slightly increased (Fig.4 and Supplementary  
250 Fig.8a,b). This demonstrates that JASPer *per se* does not need JIL-1 for H3K36me3  
251 interaction, but its binding is enhanced on the male X chromosome in the JJ-complex.  
252 Interestingly, the loss of JASPer after depletion of JIL-1 is stronger closer to the ~300 high  
253 affinity sites (HAS) bound by the DCC along the X chromosome (Supplementary Fig.8c  
254 Concomitantly, the spreading of MSL3 from HAS is slightly diminished and the H4K16ac  
255 density slightly drops but mostly independent of the distance to HAS after *jil-1* RNAi. These  
256 small differences in the dosage compensation hallmark probably cannot explain the loss of  
257 JASPer enrichment. It thus appears that JASPer's enrichment on the male X chromosome  
258 depends mostly directly on JIL-1.

259 Because the main difference between the X chromosome and autosomes is the presence of  
260 the DCC and gene-body H4K16 acetylation, the enrichment of the JJ-complex on the X  
261 chromosome may be due to functional interactions of the JJ-complex with the DCC. Direct  
262 interaction of JIL-1 with MSL1 and MSL3 subunits of the DCC had been shown *in vitro*<sup>44</sup>, but  
263 so far no clear direct association of the two endogenous complexes has been documented  
264 (see also below). We explored the interaction between the two recombinant complexes after  
265 expression from baculovirus vectors. Extracts containing JJ-complex (FLAG-JIL-1/untagged  
266 JASPer) on the one hand and a partial DCC consisting of MSL1, MSL2 and MSL3 (FLAG-  
267 MSL1/untagged MSL2/FLAG-MSL3) on the other hand were mixed in appropriate  
268 stoichiometry<sup>45</sup> and specific antibodies were used for immunoprecipitation (Supplementary  
269 Fig.8d). The MSL1 antibody retrieved not only the associated MSL2 and 3, but also some JJ-  
270 complex. Conversely, the JIL-1 antibody immunoprecipitated MSL proteins in addition to  
271 abundant JJ-complex. This suggests that the two complexes may directly interact with each  
272 other. Altogether, the enrichment of the JJ-complex on the male X chromosome may be  
273 explained, at least in part, by a JIL-1-dependent interaction between the JJ-complex and the  
274 DCC.

275

### 276 **The JJ-complex fine-tunes gene expression genome-wide and supports balanced** 277 **expression of X-linked genes in male cells**

278 As we confirmed that the JJ-complex binds to active gene bodies, we wished to explore the  
279 functional consequences. Therefore, we quantified the transcriptome changes by RNA-seq  
280 after RNAi depletion of JASPer or JIL-1 in male S2 and female Kc cells. PCA analysis  
281 showed that *jasper* and *jil-1* RNAi affected overall gene expression similarly (Supplementary



282 Fig.9a). The per-gene analysis showed for both cell lines that upon *jasper* and *jil-1* RNAi  
283 transcriptional output of many genes changed over a wide range of expression levels, with  
284 more genes being down-regulated ( $fdr < 0.05$ ) (Fig.5a). The changes upon *jasper* and *jil-1*  
285 RNAi correlate ( $r = 0.597$  in S2 and  $r = 0.561$  in Kc cells), indicating that depletion of the JJ-  
286 complex and of JIL-1 alone have a similar phenotype (Supplementary Fig.9b). Remarkably,  
287 transcription of X chromosomal genes is globally reduced upon depletion of either protein in  
288 male S2, but not in female Kc cells (Fig.5b). To explore the underlying molecular  
289 mechanisms, we monitored changes in the diagnostic histone modifications H3K9me2 and  
290 H4K16ac at expressed genes upon JIL-1 depletion in male S2 cells using the spike-in ChIP-  
291 seq approach (Supplementary Fig.9c). In agreement with a decreased expression of X-  
292 chromosomal genes, a small increase of H3K9me2 and a slight decrease of H4K16ac were  
293 observed. We related the slight increase of H3K9me2 to an increased susceptibility of the X  
294 chromosome to invasion of patches of heterochromatin as also seen in control cells  
295 (Supplementary Fig.9c). The decrease in H4K16ac on the male X chromosome observed  
296 both globally (Fig.4a,b) and specifically at expressed genes (Supplementary Fig.9c) suggests  
297 that JIL-1 may affect H4K16ac indirectly.

298 Altogether our results suggest that JIL-1 overall positively regulates gene expression and  
299 that the effect is most pronounced on the X chromosome in male cells.

300

### 301 **The JJ-complex localizes to non-LTR transposons of the HTT arrays at telomeres and** 302 **positively regulates their expression in male S2 cells**

303 JIL-1 is the only known activator of the expression of non-LTR retrotransposons of the HTT  
304 arrays (HeT-A, TAHRE and TART-A/B/C), which is essential for telomere maintenance in  
305 *Drosophila*<sup>18,19</sup>. Mapping our ChIP-seq data to the consensus sequences of 126 *D.*  
306 *melanogaster* transposable elements (TEs) we found that a subset of them showed an  
307 enrichment of H3K36me3 and JJ-complex in S2 cells (Fig.6a). H3K36me3, JASPer and JIL-1  
308 are strongly enriched at all transposons of the HTT arrays as well as at the LTR-  
309 retrotransposons Gypsy5 and 3S18 (Fig.6a). Depletion of JIL-1 and JASPer by RNAi led to  
310 statistically significant reduced expression ( $fdr < 0.05$ ) of the majority of TEs (Fig.6b,  
311 Supplementary Fig.10a). The good correlation of the effects of each RNAi ( $r = 0.850$ )  
312 supports the idea of a joint action of JIL-1 and JASPer in a functional complex  
313 (Supplementary Fig.10b). Among telomeric TEs, which are bound by the JJ-complex, the  
314 expression of HeT-A and TART-A is reduced after JASPer depletion and TART-B and -C are  
315 additionally down-regulated after JIL-1 depletion. However, we do not robustly detect  
316 expression of TAHRE. Even though we found many more significantly down-regulated TEs in  
317 S2 cells, we propose that this is indirect as these TEs lack detectable H3K36me3 enrichment

318 and JJ-complex binding (Fig.6a,b). However, the TEs of the HTT arrays seem to be mostly  
319 active and lack H3K9me2. Upon JIL-1 depletion, we detected an increase in H3K9me2 at the  
320 TEs of the HTT arrays, except for TART-C (Fig. 6c, Supplementary Fig.11). Concomitantly,  
321 the enrichment of JASPer, is decreased at all transposons of the HTT arrays upon JIL-1  
322 depletion (Supplementary Fig.11), suggesting that JIL-1 contributes to the enrichment of the  
323 JJ-complex at telomeres.

324 Altogether, we propose that TE's of the HTT arrays acquire H3K36me3 when they are  
325 transcribed and recruit the JJ-complex to maintain their active state at least in part by  
326 preventing heterochromatinization.

327

### 328 **The JJ-complex associates with other chromatin complexes**

329 To elucidate the interaction network of the JJ-complex, we immunoprecipitated JASPer with  
330 various antibodies under stringent conditions from embryo extracts and identified associated  
331 proteins by mass spectrometry. We identified 69 statistically significantly enriched proteins ( $p$ -  
332 value < 0.05 and  $\log_2$  fold-change > 4) (Fig.7a, Supplementary Table1). The five most  
333 enriched GO terms associated to those proteins include 'chromatin remodeling', 'protein  
334 acetylation', 'chromatin organization' and 'transcription from RNA Pol II promoters' and its  
335 regulation (Fig.7b). Among the most enriched interacting proteins we found BOD1, Dpy-  
336 30L1, Rbbp5 and Set1, subunits of the Set1/COMPASS complex mediating promoter-  
337 proximal H3K4 di- and trimethylation [for review<sup>46</sup>]. Dpy-30L1 and Rbbp5 are common  
338 subunits of the different COMPASS complexes, containing one of the three histone  
339 methyltransferases Set1, Trx and Trl in flies. Interestingly, BOD1/CG5514 had not been  
340 described in the *D. melanogaster* Set1/COMPASS complex but is a specific subunit of the  
341 Set1B/COMPASS complex in humans<sup>47,48</sup>. The next most represented interactors were the  
342 related PBAP and Brm remodeling complexes with e(y)3, polybromo, Bap170, Bap111 and  
343 Snr1 (Fig.7a and Supplementary Fig.13). Further subunits of the PBAP/Brm complex and  
344 other subunits of remodeling complexes were also enriched, though below statistical  
345 significance of this experiment (Fig.7b). Furthermore, we found the heterochromatin  
346 components Su(var)3-7 and Su(var)205 (HP1) significantly enriched (Fig.7a), which are  
347 known to genetically interact with JIL-1<sup>14,15</sup>. Several published interactors of JIL-1, like  
348 Chromator<sup>49</sup> or MSL1 and MSL3<sup>44</sup> were not detected or not significantly enriched, possibly  
349 because of more dynamic association. Among the subunits of the DCC, only MOF was  
350 detected together with other subunits of the alternative MOF-containing NSL (non-specific-  
351 lethal) complex (Fig.7a). NDF (nucleosome destabilizing factor) which was found associated  
352 with JIL-1 by mass spectrometry after cross-linking<sup>50</sup> was also enriched (Fig.7a). NDF has  
353 recently been shown to destabilize nucleosomes in front of the transcribing polymerase, but

354 its depletion had only minor effects on overall transcript levels<sup>51</sup>. We speculated that the JJ-  
355 complex and NDF may have redundant functions on transcription. Therefore, we compared  
356 the transcriptome changes in male S2 cells after RNAi depletion of either JASPer or NDF  
357 alone, or in combination. Although, the depletion efficiency is only partial for NDF  
358 (Supplementary Fig.12a), but PCA separates the single *jasper* and *ndf* RNAi samples well  
359 from the control samples (Supplementary Fig.12b). However, the combined depletions  
360 showed no increased variance, and the expression changes after JASPer or NDF depletion  
361 show only a weak correlation ( $r = 0.39$ , Supplementary Fig.12c). Although, JASPer and NDF  
362 co-localize to active genes marked by H3k36me3, they seem to not have redundant roles in  
363 the regulation of steady state mRNA levels.

364 In summary, we found the JJ-complex associated with the Set1/COMPASS and several  
365 nucleosome remodeling complexes. These finding may provide novel links for the regulation  
366 of chromatin structure and function through the JJ-complex.

367

## 368 Discussion

369 We showed that JIL-1 kinase forms as stable complex with a so far uncharacterized protein  
370 encoded by CG7946. We named the protein JASPer (JIL-1 Anchoring and Stabilizing  
371 Protein). Both proteins form the JASPer/JIL-1 (JJ)-complex (Fig.1), which is the major form of  
372 JIL-1 kinase *in vivo*, since JIL-1 is unstable in the absence of JASPer (Fig.2). The interaction  
373 is mediated by a short stretch of conserved residues within JIL-1's CTD containing a  
374 conserved FxGF motif and the LEDGF domain of JASPer. This interaction mode seems to  
375 be conserved throughout the animal kingdom, since the human JASPer ortholog PSIP1 (or  
376 LEDGF/p75) binds via its LEDGF/IBD (Integrase Binding Domain) domain to various  
377 interaction partners, including HIV integrase, MLL1-MENIN complex and IWS1 containing the  
378 conserved FxGF motif<sup>29</sup>. These interactions may also trigger deleterious targeting. For  
379 example, PSIP1 is hijacked by the HIV integrase to ensure integration of the virus genome in  
380 active chromatin, or PSIP1 mis-targets the MLL1 fusion in mixed-lineage leukemia (MLL),  
381 inducing malignant transformation. Interestingly, the stability of the interaction with MLL1 is  
382 regulated through phosphorylation<sup>29</sup>. We found similar proteins and complexes associated  
383 with the JJ-complex under stringent IP-MS conditions. The most prominent interactors, Dpy-  
384 30L1, BOD1, Rbbp5 and Set1 are subunits of the Set1/COMPASS complex, which is related  
385 to the human MLL complexes. Several subunits of the PBAP/Brm complex as well as other  
386 remodeling complexes are also enriched with the JJ-complex and contribute to the most  
387 enriched GO term (Fig.7).

388 We suggest that JASPer drives the targeting of JIL-1 to active chromatin through its PWWP  
389 domain. The protein binds DNA and RNA as well as H3K36me3 nucleosomes *in vitro*. We

390 propose that the recruitment of the JJ-complex to the body of active genes enriched in  
391 H3K36me3 (Fig.3) is the main recruitment mode of JIL-1 kinase to chromatin, but we do not  
392 exclude that additional interactions implicating other partners occur at promoters and  
393 enhancers as described earlier<sup>8,21</sup>. Recently, the protein PWWP2A protein was described to  
394 bind H2A.Z-containing nucleosomes at the 5' end of transcribed genes as well as active  
395 gene bodies decorated with H3K36me3 using two different binding modules<sup>34,52</sup>.

396 The same targeting principle by JASPer binding via its PWWP domain to H3K36me3 may be  
397 used to recruit JIL-1 to telomeric HTT transposons (Fig.6). However, it is not clear if those  
398 transposons acquire H3K36me3 through the Set2-dependent methylation associated with  
399 elongating RNA Pol II, as coding genes do<sup>53</sup> or by another mechanism.

400 The recombinant JJ-complex has a strong kinase activity towards S10 on isolated H3 *in vitro*  
401 but the efficiency of phosphorylating H3S10 in nucleosomes is very low (Supplementary  
402 Fig.4). H3K36me3 is essential to bring JIL-1 to active chromatin, but is not sufficient to  
403 unleash its kinase activity towards nucleosomes *in vitro*. We speculate that JIL-1 may need  
404 to be activated by specific signals generated within chromatin or downstream of a signaling  
405 pathway, similarly to its orthologous kinases MSK1/2 [for review see<sup>54</sup>]. However, the  
406 nucleosome may not be the physiological substrate for JIL-1. During the course of  
407 transcription, nucleosome are disassembled and evicted histones associate with various  
408 chaperones to be reassembled after the passage of the polymerase [for review see<sup>55</sup>]. Thus,  
409 the *in vivo* H3 substrate for JIL-1 phosphorylation could also be any intermediate, occurring  
410 during the transcription process.

411 Methylation of H3K36 at active chromatin has pleiotropic functions in various model  
412 organisms, such as repression of spurious transcription, alternative splicing, DNA repair and  
413 recombination [for review see<sup>56</sup>]. We summarize in Fig.7c, the different factors known to  
414 localize to H3K36me3 chromatin in *D. melanogaster*. Recently, a H3K36R mutant of the  
415 replication-dependent H3 in *D. melanogaster*, resulting in almost complete loss of  
416 H3K36me3, showed that this residue is essential for complete development<sup>57</sup> and triggers  
417 dysregulation of transcript levels mostly by post-transcriptional mechanisms<sup>58</sup>. Our results  
418 are compatible with an indirect function of H3K36me3 on transcriptional output.

419 It is attractive to speculate that JIL-1 may affect gene activity indirectly through installation of  
420 a phospho-methyl switch in interphase. Accordingly, phosphorylation of S10 prevents  
421 methylation of H3K9, which would hinder heterochromatinization by inhibiting further H3K9  
422 methylation and HP1 binding<sup>9,14</sup>. We found that in JASPer<sup>cw2/cw2</sup> deficient flies, as already  
423 described for JIL-1<sup>z2/z2</sup> null flies, heterochromatin histone marks and HP1 spreads from the  
424 chromocenter especially to the X chromosome on polytene nuclei of salivary glands (Fig.2d).  
425 JIL-1 depletion in S2 cells induces a small but significant increase of H3K9me2 on genes

426 (Supplementary Fig.8,9c) in S2 cells. The quantification of H3K9me2 on transposons of the X  
427 chromosome is not yet possible due to the lack of annotation of these elements. However,  
428 transposons of the HTT arrays, which are in a heterochromatic environment, clearly acquire  
429 H3K9me2. The apparent difference in the magnitude of H3K9me2 spreading between the  
430 salivary gland cells and S2 cells might be due to several reasons. First, the strong mitotic  
431 H3S10ph by Aurora kinase B might reset the system at each cell division in cultured cells.  
432 Second, the endoreplication in salivary gland cells might exacerbate the antagonism  
433 between H3S10ph and H3K9me2 due to replication as described in mESCs<sup>7</sup>. Third, the  
434 absolute amount of H3K9me2 spreading on the X chromosome, although evident on  
435 polytene chromosome preparations might be low, as observed in mESCs<sup>7</sup>.

436 The most prominent effect in our RNA-seq experiments is the specific reduction of X-  
437 chromosomal transcription in male S2 but not female Kc cells. Because the JJ-complex is  
438 also enriched on the X chromosome in male cells in a JIL-1- and dosage compensation  
439 dependent manner (Fig.4), there may be a link either to the specific compensation  
440 mechanism established by the DCC or to a more general compensation mechanism known  
441 to occur in response to variation in copy number of genes. Such a 'generic' compensation  
442 mechanism has been described in many eukaryotes, as well as in various *Drosophila* cell  
443 lines<sup>59,60</sup>. There are two main arguments for the first scenario: the enrichment of the JJ-  
444 complex on the X chromosome in males depends on the DCC and decreases with increasing  
445 distance to HAS [<sup>6</sup> and Supplementary Fig.8b] and we documented a weak but consistent  
446 interaction of the recombinant JJ-complex and partial DCC (Supplementary Fig.8c).

447 Finally, we can imagine a role for the JJ-complex in the context of safeguarding genome  
448 stability threatened by R-loop formation. The presence of H3S10ph at transcribed regions  
449 has been related to the formation of R-loops, and proposed to be important to prevent  
450 genomic instability<sup>61,62</sup>. In *Drosophila* cells, almost 50% of R-loops detected by GRID-seq  
451 appear within genes<sup>63</sup>. The formation of R-loops and associated proteins could trigger the  
452 activation of JJ-complex for efficient H3S10 phosphorylation. Ectopic H3S10ph by JIL-1  
453 correlates large-scale chromatin opening *in vivo*<sup>64</sup> although H3S10ph *per se* has no effect on  
454 chromatin structure *in vitro*<sup>65</sup>. Conceivably, other proteins than H3 may be relevant  
455 substrates for the JJ-complex. Chromatin remodeling enzymes, which correspond to the  
456 most significantly overrepresented GO term in our unbiased IP-MS analysis of the JJ-  
457 complex interaction network would be good candidates for such regulation.

458 In summary, we showed that JASPer is essential for JIL-1 function: it stabilizes JIL-1 and  
459 recruits it to transcribed chromatin. Future goals will be to unravel the signaling events that  
460 lead to activation of the JJ-complex, its non-histone substrates and role in modulating  
461 chromatin structure and function.

462

## 463 **Methods**

### 464 **Cell culture, RNAi and RNA-seq and analysis**

465 S2-DRSC (DGRC stock # 181), Kc167 (DGRC stock # 1) cells were cultured in Schneider's  
466 *Drosophila* Medium (Thermo Fisher), supplemented with 10% heat-inactivated Fetal Bovine  
467 Serum (Sigma-Aldrich), 100 units/mL penicillin and 0.1 mg/mL streptomycin (Sigma-Aldrich)  
468 at 26°C. RNAi against target genes in S2 and Kc cells for ChIP-seq was performed as  
469 previously described<sup>45</sup>. For RNAi against target genes in S2 and Kc cells for RNA-seq, cells  
470 were washed with serum-free medium and 10 µg dsRNA per 10<sup>6</sup> cells at a concentration of  
471 10 µg/mL in serum-free medium (10<sup>6</sup> cells in 6-well plate) was added, incubated for 10 min at  
472 room temperature (RT) with slight agitation and further 50 min at 26°C. Two volumes of  
473 complete growth medium were added and cells were incubated for 3 days at 26°C. At day 3,  
474 cells were split, reseeded and retreated as at day 1. Cells were incubated for further 4 days  
475 at 26°C. dsRNA was generated from PCR products obtained using the following forward and  
476 reverse primers (separated by comma):

477 *jasper* RNAi #1: TTAATACGACTCACTATAGGGAGAATGGGTAAGGAA,  
478 TTAATACGACTCACTATAGGGAGAGGAGGTGCTAGT;

479 *jasper* RNAi #2: TTAATACGACTCACTATAGGGAGATGGAGAACGCCCGCAAAGAA,  
480 TTAATACGACTCACTATAGGGAGATTGCCACATACCGGCGAAG;

481 *jil-1* RNAi #1: TTAATACGACTCACTATAGGGAGACAGCAGCGTCCG,  
482 TTAATACGACTCACTATAGGGAGATTGGAAGTAT;

483 *jil-1* RNAi #2: TTAATACGACTCACTATAGGGAGACAGTGGTTATCCCTTCGCA,  
484 TTAATACGACTCACTATAGGGAGATACCGCGGAGAATGAATACC;

485 *gst* RNAi: TTAATACGACTCACTATAGGGAGAATGTCCCCTATACTAGGTTA,  
486 TTAATACGACTCACTATAGGGAGAACGCATCCAGGCACATTG;

487 *gfp* RNAi: TTAATACGACTCACTATAGGGTGCTCAGGTAGTGGTTGTCCG,  
488 TTAATACGACTCACTATAGGGCCTGAAGTTCATCTGCACCA;

489 *ndf* RNAi #1: TTAATACGACTCACTATAGGGAGAATCGGTCAAGTCGACAAAGG,  
490 TTAATACGACTCACTATAGGGAGATCATTCCAAGACCCAGGAAGC;

491 *ndf* RNAi #2: TTAATACGACTCACTATAGGGAGACCGAAAGCAAAGTCCGTGG,  
492 TTAATACGACTCACTATAGGGAGAAACCTTGTGACCCGTGTAGA;

493 *D. virilis* 79f7Dv3 cells<sup>66</sup> (kind gift of B. V. Andrianov) were cultured in Schneider's *Drosophila*  
494 Medium (Thermo Fisher), supplemented with 5% heat-inactivated Fetal Bovine Serum

495 (Sigma-Aldrich), 100 units/mL penicillin and 0.1 mg/mL streptomycin (Sigma-Aldrich) at  
496 26°C.

497 Sf21 cells (Thermo Fischer) were cultured in SF900 II SFM (Thermo Fisher), supplemented  
498 with 10% heat-inactivated Fetal Bovine Serum (Sigma-Aldrich), 0.1 mg/mL gentamicin  
499 (Sigma-Aldrich) at 26°C.

500

## 501 **Recombinant gene expression and protein purification**

502 For purification of GST-JASPer fusion protein, the coding sequence of JASPer (CG7946-RA)  
503 from EST clone LD23804 was cloned into pGEX-4T2. GST-JASPer was expressed in *E. coli*  
504 Rosetta 2 (DE3) (Merck) and purified using Glutathione Sepharose High Performance beads  
505 (GE Healthcare) for antibody generation. For all biochemical assays, we used the  
506 baculovirus expression system in Sf21 cells. For purification of recombinant JASPer and  
507 aromatic cage mutant (Y23A and W26A) by FLAG-tag affinity chromatography, the coding  
508 sequence of JASPer was directly fused to a C-terminal coding sequence of FLAG affinity tag  
509 and cloned into pFBDM under control of the polyhedrin promoter<sup>22</sup>. For dual expression of  
510 the JJ-complex, we cloned FLAG-JIL-1 or active site mutants (D407A and D759A) and  
511 fragments thereof into pFBDM under the control of the polyhedrin promoter together with  
512 untagged JASPer or aromatic cage mutants (Y23A and W26A) and fragments thereof under  
513 the control of the p10 promoter. An N-terminal FLAG tag was directly cloned in front of the  
514 JIL-1 gene (JIL-1-RA)<sup>16</sup>. FLAG-MSL3 was expressed from pFastBac1 as described<sup>67</sup>. FLAG-  
515 MSL1 was expressed from pFBDM under the control of the polyhedrin promoter together  
516 with untagged MSL2 under the control of the p10 promoter (Müller et al., manuscript in  
517 preparation).

518 The JJ-complex and JASPer were expressed in Sf21 cells and purified by FLAG-tag affinity  
519 chromatography, as previously described<sup>68</sup> with minor modifications. In brief, Sf21 cells at  
520  $10^6$  cells/mL ( $250 \times 10^6$  cells) were infected 1:1000 (v/v) with baculovirus, expressing JJ-  
521 complex or JASPer-FLAG. After 72 h, cells were harvested and washed once in PBS, frozen  
522 in liquid nitrogen and stored at -80°C. To lyse, cells were rapidly thawed, resuspended in  
523 0.4 mL Lysis Buffer per 50 mL of culture (50 mM HEPES pH 7.6, 400 mM NaCl, 1 mM  
524 MgCl<sub>2</sub>, 5% (v/v) glycerol, 0.5% (v/v) IGEPAL CA-360, 1 mM DTT) supplemented with  
525 cOmplete EDTA-free Protease Inhibitor Cocktail (Sigma-Aldrich) (PI). The suspension was  
526 sonicated for 60 s at 20% Amplitude (Branson-Sonifier) with 5 s 'on' and 10 s 'pause' cycles.  
527 Cell extract was treated with 1 µL Benzonase (Merck), supplemented with 0.15% (v/v) Triton-  
528 X-100, incubated with end-over-end rotation for 30 min at 4°C and spun down at 4°C for  
529 30 min at 50,000 g. The supernatant was used for FLAG-tag affinity purification with 1.2 µL  
530 of a 50% slurry of FLAG-M2 beads (Sigma-Aldrich) per 1 mL of culture. Beads were first

531 washed thrice in 20 bed volumes of Lysis Buffer, subsequently supernatant was added and  
532 incubated with end-over-end rotation for 3 h at 4°C. Beads were pelleted (4°C, 5 min, 500 g)  
533 and supernatant was removed. Beads were washed twice with 20 bed volumes each of  
534 Lysis Buffer, Wash Buffer (Lysis Buffer with 1 M NaCl) and finally twice with 20 bed volumes  
535 Elution Buffer (Lysis Buffer with 200 mM NaCl). For protein elution, beads were incubated  
536 with 0.2 bed volumes of Elution Buffer containing 5 mg/mL FLAG peptide (Sigma-Aldrich) for  
537 10 min at 4°C and subsequently 0.6 bed volumes of Elution Buffer with PI were added and  
538 incubated with end-over-end rotation for 2 h at 4°C. The elution step was repeated and  
539 elution fractions were combined. Protein concentration was determined using BSA standards  
540 on SDS-PAGE with Coomassie brilliant blue G250 staining. Concentrated protein was  
541 flash-frozen in aliquots in liquid nitrogen and stored at -80°C. For nucleosome  
542 immunoprecipitation, buffer was exchanged by adding 9 volumes of Exchange Buffer 1  
543 (50 mM HEPES pH 7.6, 500 mM NaCl, 1 mM MgCl<sub>2</sub>, 10% (v/v) glycerol, 0.05% (v/v) Triton-  
544 X-100, 1 mM DTT, 0.5mM EDTA, 2.5mM L-Aspartate) and concentrating with 30 MWCO  
545 Amicon Ultra-15 (Merck) to the starting volume. The proteins were again diluted in 9 volumes  
546 of Exchange Buffer 2 (Exchange Buffer 1 with 200 mM NaCl) and concentrated with  
547 30 MWCO Amicon Ultra-15 (Merck).

#### 548 **Electro mobility shift assay**

549 EMSA with dsDNA was performed as described in<sup>69</sup>, with slight modifications. In brief,  
550 binding reactions containing 70 nM 40 bp Cy5-labeled dsDNA  
551 (CCTGGAGAATCCCGGTGCCGAGGCCGCTCAATTGGTCGTA) in Binding buffer  
552 (50 mM HEPES pH 7.6, 50 mM NaCl, 10% (v/v) Glycerol, 2 mM MgCl<sub>2</sub>, 10% (w/v) BSA)  
553 were incubated for 10 min at RT. EMSA with RNA was performed as described in<sup>32</sup> with  
554 2.5 nM 123 nt <sup>32</sup>P-labeled roX2-123 RNA.

#### 555 **Generation of JASPer null mutant fly line**

556 The JASPer null allele cw2 was isolated in a screen for imprecise excisions from the EP-  
557 element line GS3268 from the Kyoto Stock Center using standard techniques<sup>70</sup> and as  
558 previously described<sup>1</sup>. The approximate breakpoint locations were determined by PCR-  
559 analysis as shown in Fig.2c.

#### 560 **Antibodies**

561 Polyclonal antibodies against JIL-1,  $\alpha$ -JIL-1 R69 and R70 were described in<sup>6</sup> and Hope in<sup>20</sup>.  
562 GST-JASPer (1-475) was used to generate polyclonal antibodies ( $\alpha$ -JASPer GP13 and  
563 GP14) in guinea pigs (Eurogentech) as well as the monoclonal (E. Kremmer) antibodies  $\alpha$ -  
564 JASPer 6F7 and 4D8.  $\alpha$ -NDF was a kind gift from J. Kadonaga<sup>71</sup> and GST-MSL3 was used  
565 to generate polyclonal antibodies ( $\alpha$ -MSL3) in guinea pig (Pineda Antikörper-Service)<sup>72</sup>. The



566 following commercially available antibodies were used:  $\alpha$ -H3K36me3 (Abcam, ab9050),  $\alpha$ -  
567 FLAG (Sigma, F3161),  $\alpha$ -H3K9me2 (Abcam, ab1220),  $\alpha$ -H3 (Cell Signaling, 9715),  $\alpha$ -  
568 H3S10ph (Cell Signaling, 9701),  $\alpha$ -H4 (Abcam, ab10158),  $\alpha$ -H4K16ac (Millipore, 07-329),  $\alpha$ -  
569 Tubulin (Sigma-Aldrich, T9026), and  $\alpha$ -LacI (Millipore, 05-503).

#### 570 **Immunofluorescence microscopy of polytene chromosomes**

571 Immunofluorescence microscopy analysis of polytene chromosome squash preparations was  
572 performed as described in<sup>73</sup>. LacI-tagged JIL-1 constructs and the Lac operator insertion line  
573 *P11.3* were described in<sup>64,74</sup>. These lines include: LacI-JIL-1-FL, LacI-JIL-1-CTD, and LacI-  
574 JIL-1- $\Delta$ CTD. GAL4-expression was driven by generating recombinant lines with *Sgs3-GAL4*  
575 and *da-GAL4* drivers obtained from the Bloomington Stock Center. Antibody labeling  
576 protocols were as in<sup>75</sup>. DNA was visualized by staining with Hoechst 33258 (Molecular  
577 Probes) in PBS. The appropriate species- and isotype- specific Texas Red-, TRITC-, and  
578 FITC-conjugated secondary antibodies (Cappel/ICN, Southern Biotech) were used (1:200  
579 dilution) to visualize primary antibody labeling. Mounting of the preparations was in 90%  
580 glycerol including 5% n-propyl gallate. Epifluorescence optics were used to examine the  
581 preparations on a Zeiss Axioskop microscope. Images were obtained and digitized using a  
582 Spot CCD camera. Photoshop (Adobe) was used to pseudocolor, image process, and merge  
583 images. Non-linear adjustments were performed for some images of Hoechst labeling for the  
584 best chromosomal visualization.

#### 585 **Embryo extracts**

586 Nuclear extract from embryos were prepared 12 hour embryo collections as described in<sup>76</sup>.

#### 587 **JASPer identification**

588 For preparative immunoprecipitation (IP), 300  $\mu$ g nuclear embryo extract 0-12h at a  
589 concentration of 3 mg/mL in HEMG100 buffer (25 mM HEPES pH 7.6, 100 mM KCl, 10%  
590 (v/v) glycerol, 0.1 mM EDTA, 12.5 mM MgCl<sub>2</sub>) were used per IP. Protein A and Protein G  
591 beads mix (1:1) (GE Healthcare) were washed with HEMG100. The diluted extract was  
592 pre-cleared with 15  $\mu$ L (30  $\mu$ L 50% slurry) Protein A:Protein G beads mix by incubating with  
593 end-over-end rotation for 1 h at 4°C. Beads were pelleted and supernatant was directly used  
594 for IP. For IP, the reaction was added to 15  $\mu$ L (30  $\mu$ L 50% slurry) Protein A:Protein G beads  
595 (GE Healthcare) pre-coupled with antibodies. For pre-coupling, beads were washed with  
596 HEMG100 buffer and incubated with end-over-end rotation for 1 h at 4°C with 2  $\mu$ g  
597 antibodies in HEMG100, using affinity-purified  $\alpha$ -JIL-1 R69 and R70 and non-specific rabbit  
598 IgG as control. Beads were washed with HEMG100, the extract was added and incubated  
599 with end-over-end rotation for 1 h at 4°C. Beads were spun down and washed three times  
600 with HEMG100. Proteins were eluted by incubating beads with HEMG100 supplemented with

601 0.5% (m/v) N-lauroylsacrosine with end-over-end rotation for 1 h at 4°C. Proteins were  
602 separated by 4-20% gradient SDS-PAGE with Coomassie brilliant blue G250 staining and  
603 the most prominent band was cut out for mass spectrometry analysis.

604

#### 605 **Immunoprecipitation with mass spectrometry analysis and data analysis**

606 For IP/MS analysis, IP's were performed from two independent nuclear embryo extracts with  
607 two different  $\alpha$ -JASPer polyclonal Sera (GP13 and GP14) and two different culture  
608 supernatants containing monoclonal antibodies (6F7 and 4D8), as negative control a non-  
609 specific serum or culture medium was used. In brief, 400  $\mu$ g of extract was diluted to  
610 1 mg/mL in BBN buffer (10 mM Tris/Cl pH 8.0, 140 mM NaCl, 1 mM EDTA, 1% (v/v) Triton X-  
611 100, 0.1% (v/v) Na deoxycholate, 0.1% (v/v) IGEPAL-CA-360, 0.5 mM DTT) supplemented  
612 with cComplete EDTA-free Protease Inhibitor Cocktail (Sigma-Aldrich). Protein G beads  
613 (GE Healthcare) were washed thrice with 10 bed volumes BBN buffer. The diluted extract  
614 was pre-cleared with 10  $\mu$ L (20  $\mu$ L 50% slurry) Protein G beads by incubating with  
615 end-over-end rotation for 1 h at 4°C. Beads were pelleted at 4°C for 5 min at 500 g and  
616 supernatant was directly used for IP. For IP, the reaction was added to 25  $\mu$ L (50  $\mu$ L  
617 50% slurry) Protein G beads (GE Healthcare) pre-coupled with antibodies. For pre-coupling,  
618 beads were washed thrice with BBN buffer and incubated with end-over-end rotation for  
619 3-4 h at 4°C with 1.5 mL culture supernatant containing monoclonal antibody and culture  
620 medium as control or 2  $\mu$ L serum in BBN buffer. Beads were washed thrice with BBN buffer,  
621 the extract was added and incubated with end-over-end rotation for 3-4h at 4°C. Beads were  
622 spun down and washed thrice with 40 bed volumes BBN buffer and twice in 10 bed volumes  
623 50 mM Tris/Cl pH 7.5 by incubating with end-over-end rotation for 10 min at 4°C. The whole  
624 IP was used for trypsin digestion and mass spectrometry analysis. For LC-MS/MS purposes,  
625 desalted peptides were injected in an Ultimate 3000 RSLCnano system (Thermo), separated  
626 in a 15-cm analytical column (75 $\mu$ m ID home-packed with ReproSil-Pur C18-AQ 2.4  $\mu$ m from  
627 Dr. Maisch) with a 50-min gradient from 5 to 60% acetonitrile in 0.1% formic acid. The  
628 effluent from the HPLC was directly electrosprayed into a Qexactive HF (Thermo) operated  
629 in data-dependent mode to automatically switch between full scan MS and MS/MS  
630 acquisition. Survey full scan MS spectra (from m/z 375–1600) were acquired with resolution  
631  $R = 60,000$  at m/z 400 (AGC target of  $3 \times 10^6$ ). The 10 most intense peptide ions with charge  
632 states between 2 and 5 were sequentially isolated to a target value of  $1 \times 10^5$ , and fragmented  
633 at 27% normalized collision energy. Typical MS conditions were: spray voltage, 1.5 kV; no  
634 sheath and auxiliary gas flow; heated capillary temperature, 250°C; ion selection threshold,  
635 33,000 counts. MaxQuant version 1.5.2.8<sup>77</sup> was used to identify proteins and to quantify by  
636 iBAQ with the following parameters: Database, UP000000803\_7227\_Drome\_20160809; MS

637 tol, 10ppm; MS/MS tol, 0.5 Da; Peptide FDR, 0.1; Protein FDR, 0.01 Min. peptide Length, 5;  
638 Variable modifications, Oxidation (M); Fixed modifications, Carbamidomethyl (C); Peptides  
639 for protein quantitation, razor and unique; Min. peptides, 1; Min. ratio count, 2. The resulting  
640 "proteinGroups.txt" file was used for further downstream analysis using DEP version 1.4.0<sup>71</sup>  
641 (R) and MSnbase version 2.8.1<sup>78</sup> (R). First, reverse proteins and potential contaminants were  
642 removed. The data was filtered for missing values allowing maximally one missing value in at  
643 least one condition by calling the function filter\_missval (R) (parameter thr = 1). Missing  
644 values in control IP samples were considered as missing not at random and imputed using  
645 the quantile regression imputation of left-censored data (QRILC) method by calling the  
646 function impute (R) (parameter method = "QRILC"). Missing values in the IP samples were  
647 considered as missing at random and imputed using the quantile k-nearest neighbor (knn)  
648 method by calling the function impute (R) (parameter method = "knn"). To test for statistically  
649 significant differentially enriched proteins, the function test\_diff (R) was called including  
650 condition and sample variables. Proteins were considered as statistically significant enriched  
651 with p-value < 0.05 and log<sub>2</sub> fold enrichment > 4. GO term analysis of statistical significant  
652 enriched proteins was performed with <http://www.pantherdb.org> using the PANTHER  
653 Overrepresentation Test analysis type and PANTHER GO-Slim Biological Process GO  
654 terms<sup>79,80</sup>. Protein-Protein interaction network on known interactions of statistically  
655 significantly enriched proteins was generated using Cytoscape version 3.7.0<sup>81</sup> and STRING  
656 database<sup>82</sup>.

### 657 **Mapping of interaction domain and co-immunoprecipitation with MSL proteins**

658 Interaction domains in JASPer and JIL-1 were mapped by co-IP of various truncation  
659 mutants and interaction of JJ-complex with MSL1, MSL2 and MSL3 was analyzed by co-  
660 immunoprecipitation from Sf21 cell extracts as described in<sup>45</sup>.

### 661 **Mononucleosomes, 12-mer nucleosome arrays and kinase assays.**

662 Mononucleosomes and nucleosome arrays used as substrates for the kinase assays were  
663 prepared by salt gradient dialysis as described<sup>33,83</sup>. Briefly, histone octamers (wt and  
664 H3K36me3), (biotinylated) scavenger MMTV DNA, and the corresponding 601 DNA<sup>33,84</sup> in 20  
665 mM Tris/HCl, 2 M KCl, 0.1 mM EDTA pH 7.5 at 4°C were dialyzed into 200 ml nucleosome  
666 start buffer (10 mM Tris/HCl, 1.4 M KCl, 1 mM DTT, 0.1 mM EDTA pH 7.5 at 4°C) for 1h.  
667 330 ml nucleosome end buffer (10 mM Tris/HCl, 10 mM KCl, 1 mM DTT, 0.1 mM EDTA pH  
668 7.5 at 4°C) was added overnight at 4°C using a peristaltic pump (rate 1 ml/min).  
669 Subsequently, two additional dialysis steps (4h and 2h) were performed using 200 ml  
670 nucleosome end buffer. The samples were centrifuged (17,000 g, 4°C, 10 min) and the  
671 supernatant isolated. Mononucleosome samples were treated with streptavidin-coated

672 magnetic beads (New England Biolabs) to deplete the biotinylated MMTV DNA and MMTV  
673 nucleosomes. All nucleosome arrays were purified by selective MgCl<sub>2</sub> precipitation<sup>85</sup>.

674 Recombinant H3 was prepared from inclusion bodies as described in<sup>86</sup>. Prior to the label-free  
675 kinase assays, the ratio of JJ-complex to H3 was determined by radioactive kinase assays  
676 using  $\gamma$ -ATP and 50  $\mu$ M non-radioactive ATP in 20  $\mu$ l total reaction volume as described  
677 earlier<sup>6</sup>. Using 2.5 pmole of JJ-complex and 10 pmole of H3 per assay yielded an  
678 incorporation of 1 phosphate per H3 molecule. We used the same conditions in the label-free  
679 kinase assays with 1 mM of non-radioactive ATP. All reactions were performed in parallel  
680 with JJ-complex containing wild type kinase and JJ-complex containing the kinase dead  
681 mutant, which is inactive because mutated at both active sites (D407A and D759A). For  
682 quantification purposes, we loaded 0.8, 1.6 and 3.2 % of the reaction performed with isolated  
683 H3, corresponding to 1.2, 2.4 and 4.8 ng, respectively and 30 % (3.3 pmole) of the reactions  
684 performed with the different types of nucleosomes. The quantitative H3S10ph detection and  
685 the loading controls (H4 and H3K36me3) were achieved using IR-coupled secondary  
686 antibodies and Odyssey Imaging System (LI-COR).

#### 687 **Nucleosome pull-down**

688 Nucleosome library preparation, pull-down experiments and data analysis were performed as  
689 described in<sup>33</sup>. Per pull-down reaction, 1.5 pmole protein was used for JASPer-FLAG and  
690 aromatic cage mutant and for JJ-complex and aromatic cage mutant and pre-coupled to 5  $\mu$ L  
691 FLAG-M2 beads (Sigma-Aldrich) (10  $\mu$ L 50% slurry) in Binding buffer (20 mM Tris/Cl pH 7.5,  
692 50 mM NaCl, 5 mM EDTA, 0.1% (v/v) TWEEN 20). The protein pre-coupled to beads was  
693 incubated with 1.38 pmole nucleosome library containing 115 nucleosome types (12 fmole  
694 per nucleosome type) in a total of 200  $\mu$ L Binding buffer for 4h at 4°C with end-over-end  
695 rotation. Beads were washed four times with 40 bed volumes (200  $\mu$ l) Binding buffer and  
696 DNA eluted by Proteinase K digestion and purified using a QIAGEN PCR purification kit for  
697 further library preparation and sequencing.

#### 698 **ChIP-seq**

699 ChIP-seq on MNase-digested chromatin and sonicated chromatin was performed as  
700 previously described<sup>45,87</sup>. For spike-in ChIP-seq on MNase-digested chromatin in  
701 combination with mild sonication, S2 cells (~3\*10<sup>8</sup> cells) after RNAi were harvested and  
702 cross-linked with 1% formaldehyde for 8 min by adding 1 mL 10x fixing solution (50 mM  
703 HEPES pH 8.0, 100 mM NaCl, 1 mM EDTA, 0.5 mM EGTA) with 10% formaldehyde [16%  
704 formaldehyde solution (w/v) methanol-free (Thermo Fischer)] per 10 mL culture at RT. The  
705 reaction was stopped by adding 125 mM glycine and incubating for 10 min on ice. Cells were  
706 washed twice in PBS and snap-frozen in liquid N<sub>2</sub>. For nuclei isolation, cells were rapidly  
707 thawed and resuspended in PBS supplemented with 0.5% (v/v) Triton X-100 and cComplete

708 EDTA-free Protease Inhibitor Cocktail (Sigma-Aldrich) (PI) and 5% 79f7Dv3 cells, processed  
709 as described for S2 cells without RNAi treatment, relative to S2 cells were added, volume  
710 was adjusted to  $7 \times 10^7$  cells/mL and cells incubated for 15 min at 4°C with end-over-end  
711 rotation. Nuclei were collected by centrifuging at 4°C for 10 min at 2000 g and washed once  
712 in PBS. For chromatin fragmentation, nuclei were spun down at 4°C for 10 min at 2000 g,  
713 resuspended in RIPA (10 mM Tris/HCl pH 8.0, 140 mM NaCl, 1 mM EDTA, 1% (v/v)  
714 Triton-X 100, 0.1%(v/v) SDS, 0.1% (v/v) DOC) supplemented with PI and 2 mM CaCl<sub>2</sub> at  
715  $7 \times 10^7$  cells/mL and digested in 1 mL aliquots by adding 0.6 U MNase (Sigma Aldrich),  
716 resuspended in EX50 at 0.6 U/μL<sup>88</sup>, and incubated at 37°C for 35 min with slight agitation.  
717 The reaction was stopped by adding 10 mM EGTA and placing on ice. Digested chromatin  
718 was sheared with Covaris AFA S220 using 12x12 tubes at 50 W peak incident power,  
719 20% duty factor and 200 cycles per burst for 8 min at 5°C. Subsequent steps were  
720 performed as described in<sup>45</sup>. Libraries were prepared with NEBNext Ultra II DNA Library Prep  
721 Kit for Illumina (NEB, E7645) and analyzed with 2100 Bioanalyzer with DNA 1000 kit  
722 (Agilent). Libraries were sequenced on HiSeq 1500 (Illumina) instrument yielding typically 20-  
723 25 million 50 bp single-end reads per sample.

#### 724 **RNA-seq**

725 For RNA-seq, 2 million S2 cells or Kc cells after RNAi treatment were resuspended in Trizol  
726 and RNA was purified using the RNeasy Mini Kit (QIAGEN). Afterwards, 1 μg of purified total  
727 RNA's was used for rRNA depletion using Ribo-Zero Gold rRNA Removal Kit (Illumina,  
728 MRZG 12324) or NEBNext rRNA Depletion Kit (NEB, E6310). Library preparation was done  
729 according to the manufacturer's instructions with NEBNext Ultra II Directional RNA Library  
730 Prep Kit for Illumina (NEB, E7760) and analyzed with 2100 Bioanalyzer with DNA 1000 kit  
731 (Agilent). Libraries were sequenced on HiSeq 1500 (Illumina) instrument yielding typically 15-  
732 50 million 50 bp paired-end reads per sample.

#### 733 **NGS data analysis**

734 Sequencing data were processed using SAMtools version 1.3.1<sup>89</sup>, BEDtools version 2.26.0<sup>90</sup>,  
735 R version 3.5.1 (<http://www.r-project.org>) and Bioconductor version 3.8  
736 (<http://www.bioconductor.org>) using default parameters for function calls, unless stated  
737 otherwise.

#### 738 **Read processing**

739 Sequence reads were aligned to the *D. melanogaster* release 6 reference genome (BDGP6),  
740 *D. virilis* FlyBase release r1.07\_FB2018\_05 reference genome or to *D. melanogaster*  
741 transposon sequence set version 9.4.1 (BDGP), including only *D. melanogaster* transposons  
742 (n = 126), using Bowtie version 1.1.2<sup>91</sup> (parameter -m 1 for *D. melanogaster* genome and  
743 transposon) for ChIP-seq and STAR version 2.6.0<sup>92</sup> (parameters --quantMode

744 TranscriptomeSAM GeneCounts, --outFilterMultimapNmax 1) for RNA-seq samples. Gene  
745 and transposon quantification of RNA-seq data was performed using RSEM version 1.3.0<sup>93</sup>  
746 (parameters --bam, --paired-end, --forward-prob 0).

#### 747 **RNA-seq analysis**

748 For RNA-seq analysis, genes and transposons were considered as robustly detected with  
749 raw read counts >0 in all samples. Further analysis was performed using DESeq2 version  
750 1.22.1<sup>94</sup> (R), including blocking variables for batch effect. For transposon analysis, the size  
751 factors from the gene analysis were used. Genes and transposons were considered as  
752 statistical significant different between conditions with false discovery rate (FDR) < 0.05 by  
753 calling the function results (R). For principle component analysis (PCA), a regularized log  
754 transformation was applied to per gene counts calling the function rlog (blind = FALSE) (R).  
755 To correct for batch effects, the function ComBat (R) was called using a design matrix  
756 modelling the RNAi variable by calling the function model.matrix (R). The function plotPCA  
757 (R) was called to perform PCA.

#### 758 **Genome coverage**

759 ChIP-seq reads were extended to 150 bp and per base normalized genome coverage  
760 vectors were calculated as described in<sup>95</sup>. For normalization using *D. virilis* spike-ins, per  
761 base coverage vectors were normalized to the sum of *D. virilis* genome coverage vectors  
762 multiplied by 20 to adjust for difference in cell number. To generate non-input normalized per  
763 base genome coverage vectors, raw coverage vectors were normalized to million mapped  
764 reads (rpm).

#### 765 **Browser profiles**

766 Browser profiles were generated by calling the function plotProfiles from tsTools version  
767 0.1.1 (R) (<https://rdr.io/github/musikativ/tsTools/>) by using mean per base genome coverage  
768 vectors after smoothing by computing running medians on 501 bp windows calling the  
769 function runmed (endrule = "keep") (R).

#### 770 **ChIP-seq analysis**

771 Two H3K36me3 MNase ChIP-seq replicates in Kc and S2 cells each were previously  
772 published (GSE94115)<sup>87</sup> and the two Inputs for sonication ChIP-seq (GSE119708)<sup>45</sup>. For  
773 gene-centric ChIP-seq analysis, genes were considered as inactive with mean tpm  $\leq$  1 and  
774 active with mean tpm > 1 in control cells. Heat maps of mean normalized coverages at active  
775 genes  $\pm$  500 bp were generated calling the plotRasterHeatmap and convertToColors with  
776 using a range of 0.05 to 0.95 from tsTools version 0.1.1 (R)  
777 (<https://rdr.io/github/musikativ/tsTools/>). Only genes > 3000 bp were considered and the  
778 gene body (from TSS + 1000 bp to TTS - 1000 bp) was scaled to 2000 bp. Exons were

779 converted to ber pase gene coverage vectors using a score of 1. Genes were hierarchical  
780 clustered on the exon coverages by calculating the Euclidean distance by calling the function  
781 `dist (R)` and clustered using the 'complete' method by calling the function `hclust (R)`. To  
782 generate density plots, kernel density estimates were calculated by calling the function  
783 `density (R)`. For transposon analysis, the P-element and Penelope transposon were removed  
784 as they had zero counts in the input samples, leaving 124 transposons. For calculating  
785 ChIP-seq signal at transposons, aligned reads were extended to 150 bp fragments, reads  
786 were summed up and normalized with the size factor from reads aligned to the reference  
787 genome or for spike-in ChIP-seq to *D. virilis* reference genome. ChIP-seq signal enrichment  
788 at transposons was calculated as  $\log_2$  ratio of IP over input. Heat maps were generated by  
789 calling the function `pheatmap (R)`.

790

## 791 **Data availability**

792 The sequencing data discussed in this publication have been deposited in NCBI's Gene  
793 Expression Omnibus<sup>96</sup> and are accessible through GEO Series accession number  
794 GSE128457 (<https://www.ncbi.nlm.nih.gov/geo/query/acc.cgi?acc=GSE128457>) and the  
795 mass spectrometry data have been deposited to the ProteomeXchange Consortium<sup>97</sup> with  
796 the dataset identifier PXD012790.

797

## 798 **Funding**

799 This work was supported by a grant from the Deutsche Forschungsgemeinschaft to PBB  
800 (Be1140/8-1). CA acknowledges a DFG fellowship from the Graduate School for Quantitative  
801 Biosciences Munich (QBM). Work in the KMJ and JJ laboratory was supported by NIH grant  
802 R01 GM62916 and the Roy J. Carver Foundation. National Institutes of Health (NIH) Grants  
803 R37 GM086868, R01 GM107047 and P01 CA196539 supported the research in the  
804 laboratory of TWM. FW was funded by a postdoctoral fellowship from the German  
805 Research Foundation (WO 2039/1-1).

806

## 807 **Acknowledgement**

808 We thank R. Blattes for the cloning of the constructs for the transgenic fly lines and A.  
809 Lukacs, K. Prayitno and L. Harpprecht for sharing embryo extracts. We thank A. Scacchetti  
810 for establishing the *D. virilis* spike-in approach. We thank B.V. Andrianov to kindly share *D.*  
811 *virilis* cell line and J. Kadonaga for NDF reagents. We thank A. Imhof, I. Forné and M. Wirth  
812 at ZFP for mass spectrometry services, S. Krebs and the LAFUGA Genomics Facility for next

813 generation sequencing, E. Kremmer for monoclonal antibody generation and H. Loyd for help  
814 with antibody labelings.

815

## 816 **Author contributions**

817 CR conceived this study and performed experiments. CA performed MNase and sonication  
818 ChIP-seq experiments and all bioinformatics analysis also with support from TS. CW  
819 generated and characterized the cw2 mutant line with help from JG, WC did the LacO-LacI  
820 targeting experiments with support from YL, and JJ and KMJ supervised the work and  
821 secured funding. GPD performed mononucleosome library experiments and FW generated  
822 the mononucleosomes and arrays for the kinase assays in TWM's lab. SK prepared  
823 recombinant proteins for all *in vitro* assays, RNA-seq experiments under the supervision of  
824 CR and spike-in ChIP-seq experiments under supervision of CA. All authors analyzed data.  
825 CR and CA wrote the manuscript with contributions from all authors. PBB secured funding  
826 and established collaborations.

827

## 828 **Conflict of interest**

829 The authors declare that they have no conflict of interest.

830

## 831 **References**

- 832 1 Wang, Y., Zhang, W., Jin, Y., Johansen, J. & Johansen, K. M. The JIL-1 tandem  
833 kinase mediates histone H3 phosphorylation and is required for maintenance of  
834 chromatin structure in *Drosophila*. *Cell* **105**, 433-443, doi:S0092-8674(01)00325-7  
835 [pii] (2001).
- 836 2 Adams, R. R., Maiato, H., Earnshaw, W. C. & Carmena, M. Essential roles of  
837 *Drosophila* inner centromere protein (INCENP) and aurora B in histone H3  
838 phosphorylation, metaphase chromosome alignment, kinetochore disjunction, and  
839 chromosome segregation. *J Cell Biol* **153**, 865-880 (2001).
- 840 3 Giet, R. & Glover, D. M. *Drosophila* aurora B kinase is required for histone H3  
841 phosphorylation and condensin recruitment during chromosome condensation and to  
842 organize the central spindle during cytokinesis. *J Cell Biol* **152**, 669-682 (2001).
- 843 4 Mahadevan, L. C., Willis, A. C. & Barratt, M. J. Rapid histone H3 phosphorylation in  
844 response to growth factors, phorbol esters, okadaic acid, and protein synthesis  
845 inhibitors. *Cell* **65**, 775-783, doi:0092-8674(91)90385-C [pii] (1991).
- 846 5 Cheung, P. *et al.* Synergistic coupling of histone H3 phosphorylation and acetylation  
847 in response to epidermal growth factor stimulation. *Mol Cell* **5**, 905-915 (2000).
- 848 6 Regnard, C. *et al.* Global analysis of the relationship between JIL-1 kinase and  
849 transcription. *PLoS Genet* **7**, e1001327, doi:10.1371/journal.pgen.1001327 (2011).



- 850 7 Chen, C. C. L. *et al.* H3S10ph broadly marks early-replicating domains in interphase  
851 ESCs and shows reciprocal antagonism with H3K9me2. *Genome research* **28**, 37-51,  
852 doi:10.1101/gr.224717.117 (2018).
- 853 8 Cai, W. *et al.* Genome-wide analysis of regulation of gene expression and H3K9me2  
854 distribution by JIL-1 kinase mediated histone H3S10 phosphorylation in *Drosophila*.  
855 *Nucleic Acids Res* **42**, 5456-5467, doi:10.1093/nar/gku173 (2014).
- 856 9 Fischle, W. *et al.* Regulation of HP1-chromatin binding by histone H3 methylation and  
857 phosphorylation. *Nature* **438**, 1116-1122, doi:10.1038/nature04219 (2005).
- 858 10 Chin, H. G. *et al.* Sequence specificity and role of proximal amino acids of the histone  
859 H3 tail on catalysis of murine G9A lysine 9 histone H3 methyltransferase.  
860 *Biochemistry* **44**, 12998-13006, doi:10.1021/bi0509907 (2005).
- 861 11 Rea, S. *et al.* Regulation of chromatin structure by site-specific histone H3  
862 methyltransferases. *Nature* **406**, 593-599, doi:10.1038/35020506 (2000).
- 863 12 Lerach, S. *et al.* Loss-of-function alleles of the JIL-1 kinase are strong suppressors of  
864 position effect variegation of the *wm4* allele in *Drosophila*. *Genetics* **173**, 2403-2406,  
865 doi:genetics.106.059253 [pii]  
866 10.1534/genetics.106.059253 (2006).
- 867 13 Ebert, A. *et al.* *Su(var)* genes regulate the balance between euchromatin and  
868 heterochromatin in *Drosophila*. *Genes Dev* **18**, 2973-2983, doi:10.1101/gad.323004  
869 (2004).
- 870 14 Zhang, W. *et al.* The JIL-1 histone H3S10 kinase regulates dimethyl H3K9  
871 modifications and heterochromatic spreading in *Drosophila*. *Development* **133**, 229-  
872 235, doi:dev.02199 [pii]  
873 10.1242/dev.02199 (2006).
- 874 15 Deng, H. *et al.* JIL-1 and *Su(var)3-7* interact genetically and counteract each other's  
875 effect on position-effect variegation in *Drosophila*. *Genetics* **185**, 1183-1192,  
876 doi:10.1534/genetics.110.117150 (2010).
- 877 16 Boeke, J. *et al.* Phosphorylation of *SU(VAR)3-9* by the chromosomal kinase JIL-1.  
878 *PLoS One* **5**, e10042, doi:10.1371/journal.pone.0010042 (2010).
- 879 17 Andreyeva, E. N., Belyaeva, E. S., Semeshin, V. F., Pokholkova, G. V. & Zhimulev, I.  
880 F. Three distinct chromatin domains in telomere ends of polytene chromosomes in  
881 *Drosophila melanogaster* *Tel* mutants. *J Cell Sci* **118**, 5465-5477,  
882 doi:10.1242/jcs.02654 (2005).
- 883 18 Silva-Sousa, R. & Casacuberta, E. The JIL-1 kinase affects telomere expression in  
884 the different telomere domains of *Drosophila*. *PLoS One* **8**, e81543,  
885 doi:10.1371/journal.pone.0081543 (2013).
- 886 19 Silva-Sousa, R., Lopez-Panades, E., Pineyro, D. & Casacuberta, E. The  
887 chromosomal proteins JIL-1 and Z4/Putzig regulate the telomeric chromatin in  
888 *Drosophila melanogaster*. *PLoS Genet* **8**, e1003153,  
889 doi:10.1371/journal.pgen.1003153 (2012).
- 890 20 Jin, Y. *et al.* JIL-1: a novel chromosomal tandem kinase implicated in transcriptional  
891 regulation in *Drosophila*. *Mol Cell* **4**, 129-135, doi:S1097-2765(00)80195-1 [pii]  
892 (1999).
- 893 21 Kellner, W. A., Ramos, E., Van Bortle, K., Takenaka, N. & Corces, V. G. Genome-  
894 wide phosphoacetylation of histone H3 at *Drosophila* enhancers and promoters.  
895 *Genome research* **22**, 1081-1088, doi:10.1101/gr.136929.111 (2012).
- 896 22 Fitzgerald, D. J. *et al.* Protein complex expression by using multigene baculoviral  
897 vectors. *Nature methods* **3**, 1021-1032, doi:10.1038/nmeth983 (2006).

- 898 23 Ciuffi, A. *et al.* A role for LEDGF/p75 in targeting HIV DNA integration. *Nat Med* **11**,  
899 1287-1289, doi:10.1038/nm1329 (2005).
- 900 24 El Ashkar, S. *et al.* LEDGF/p75 is dispensable for hematopoiesis but essential for  
901 MLL-rearranged leukemogenesis. *Blood* **131**, 95-107, doi:10.1182/blood-2017-05-  
902 786962 (2018).
- 903 25 Leroux, A. E., Schulze, J. O. & Biondi, R. M. AGC kinases, mechanisms of regulation  
904 and innovative drug development. *Semin Cancer Biol* **48**, 1-17,  
905 doi:10.1016/j.semcancer.2017.05.011 (2018).
- 906 26 Lancaster, A. K., Nutter-Upham, A., Lindquist, S. & King, O. D. PLAAC: a web and  
907 command-line application to identify proteins with prion-like amino acid composition.  
908 *Bioinformatics* **30**, 2501-2502, doi:10.1093/bioinformatics/btu310 (2014).
- 909 27 Rogers, S., Wells, R. & Rechsteiner, M. Amino acid sequences common to rapidly  
910 degraded proteins: the PEST hypothesis. *Science* **234**, 364-368 (1986).
- 911 28 Correa Marrero, M., van Dijk, A. D. J. & de Ridder, D. Sequence-based analysis of  
912 protein degradation rates. *Proteins* **85**, 1593-1601, doi:10.1002/prot.25323 (2017).
- 913 29 Sharma, S. *et al.* Affinity switching of the LEDGF/p75 IBD interactome is governed by  
914 kinase-dependent phosphorylation. *Proc Natl Acad Sci U S A* **115**, E7053-E7062,  
915 doi:10.1073/pnas.1803909115 (2018).
- 916 30 Deng, H. *et al.* The JIL-1 kinase regulates the structure of Drosophila polytene  
917 chromosomes. *Chromosoma* **114**, 173-182, doi:10.1007/s00412-005-0006-8 (2005).
- 918 31 Rona, G. B., Eleutherio, E. C. A. & Pinheiro, A. S. PWWP domains and their modes  
919 of sensing DNA and histone methylated lysines. *Biophys Rev* **8**, 63-74,  
920 doi:10.1007/s12551-015-0190-6 (2016).
- 921 32 Maenner, S., Muller, M., Frohlich, J., Langer, D. & Becker, P. B. ATP-dependent roX  
922 RNA remodeling by the helicase maleless enables specific association of MSL  
923 proteins. *Mol Cell* **51**, 174-184, doi:10.1016/j.molcel.2013.06.011 (2013).
- 924 33 Dann, G. P. *et al.* ISWI chromatin remodellers sense nucleosome modifications to  
925 determine substrate preference. *Nature* **548**, 607-611, doi:10.1038/nature23671  
926 (2017).
- 927 34 Link, S. *et al.* PWWP2A binds distinct chromatin moieties and interacts with an  
928 MTA1-specific core NuRD complex. *Nat Commun* **9**, 4300, doi:10.1038/s41467-018-  
929 06665-5 (2018).
- 930 35 Davey, C. A., Sargent, D. F., Luger, K., Maeder, A. W. & Richmond, T. J. Solvent  
931 mediated interactions in the structure of the nucleosome core particle at 1.9 a  
932 resolution. *J Mol Biol* **319**, 1097-1113, doi:10.1016/S0022-2836(02)00386-8 (2002).
- 933 36 Stutzer, A. *et al.* Modulations of DNA Contacts by Linker Histones and Post-  
934 translational Modifications Determine the Mobility and Modifiability of Nucleosomal H3  
935 Tails. *Mol Cell* **61**, 247-259, doi:10.1016/j.molcel.2015.12.015 (2016).
- 936 37 Eidahl, J. O. *et al.* Structural basis for high-affinity binding of LEDGF PWWP to  
937 mononucleosomes. *Nucleic Acids Res* **41**, 3924-3936, doi:10.1093/nar/gkt074  
938 (2013).
- 939 38 van Nuland, R. *et al.* Nucleosomal DNA binding drives the recognition of H3K36-  
940 methylated nucleosomes by the PSIP1-PWWP domain. *Epigenetics Chromatin* **6**, 12,  
941 doi:10.1186/1756-8935-6-12 (2013).
- 942 39 Straub, T., Zabel, A., Gilfillan, G. D., Feller, C. & Becker, P. B. Different chromatin  
943 interfaces of the Drosophila dosage compensation complex revealed by high-shear  
944 ChIP-seq. *Genome research* **23**, 473-485, doi:10.1101/gr.146407.112 (2013).

- 945 40 Kharchenko, P. V. *et al.* Comprehensive analysis of the chromatin landscape in  
946 *Drosophila melanogaster*. *Nature* **471**, 480-485, doi:10.1038/nature09725 (2011).
- 947 41 Bell, O. *et al.* Accessibility of the *Drosophila* genome discriminates PcG repression,  
948 H4K16 acetylation and replication timing. *Nat Struct Mol Biol* **17**, 894-900,  
949 doi:10.1038/nsmb.1825 (2010).
- 950 42 Shogren-Knaak, M. *et al.* Histone H4-K16 Acetylation Controls Chromatin Structure  
951 and Protein Interactions. *Science* **311**, 844-847 (2006).
- 952 43 Orlando, D. A. *et al.* Quantitative ChIP-Seq normalization reveals global modulation  
953 of the epigenome. *Cell Rep* **9**, 1163-1170, doi:10.1016/j.celrep.2014.10.018 (2014).
- 954 44 Jin, Y., Wang, Y., Johansen, J. & Johansen, K. M. JIL-1, a chromosomal kinase  
955 implicated in regulation of chromatin structure, associates with the male specific lethal  
956 (MSL) dosage compensation complex. *J Cell Biol* **149**, 1005-1010 (2000).
- 957 45 Albig, C. *et al.* Factor cooperation for chromosome discrimination in *Drosophila*.  
958 *Nucleic Acids Res* **47**, 1706-1724, doi:10.1093/nar/gky1238 (2019).
- 959 46 Mohan, M. *et al.* The COMPASS family of H3K4 methylases in *Drosophila*. *Mol Cell*  
960 *Biol* **31**, 4310-4318, doi:10.1128/MCB.06092-11 (2011).
- 961 47 Wang, L. *et al.* A cytoplasmic COMPASS is necessary for cell survival and triple-  
962 negative breast cancer pathogenesis by regulating metabolism. *Genes Dev* **31**, 2056-  
963 2066, doi:10.1101/gad.306092.117 (2017).
- 964 48 van Nuland, R. *et al.* Quantitative dissection and stoichiometry determination of the  
965 human SET1/MLL histone methyltransferase complexes. *Mol Cell Biol* **33**, 2067-  
966 2077, doi:10.1128/MCB.01742-12 (2013).
- 967 49 Rath, U. *et al.* The chromodomain protein, Chromator, interacts with JIL-1 kinase and  
968 regulates the structure of *Drosophila* polytene chromosomes. *J Cell Sci* **119**, 2332-  
969 2341, doi:119/11/2332 [pii]  
970 10.1242/jcs.02960 (2006).
- 971 50 Wang, C. I. *et al.* Chromatin proteins captured by ChIP-mass spectrometry are linked  
972 to dosage compensation in *Drosophila*. *Nat Struct Mol Biol* **20**, 202-209,  
973 doi:10.1038/nsmb.2477 (2013).
- 974 51 Fei, J. *et al.* NDF, a nucleosome-destabilizing factor that facilitates transcription  
975 through nucleosomes. *Genes Dev* **32**, 682-694, doi:10.1101/gad.313973.118 (2018).
- 976 52 Zhang, T. *et al.* A variant NuRD complex containing PWWP2A/B excludes MBD2/3 to  
977 regulate transcription at active genes. *Nat Commun* **9**, 3798, doi:10.1038/s41467-  
978 018-06235-9 (2018).
- 979 53 Carrozza, M. J. *et al.* Histone H3 methylation by Set2 directs deacetylation of coding  
980 regions by Rpd3S to suppress spurious intragenic transcription. *Cell* **123**, 581-592,  
981 doi:S0092-8674(05)01156-6 [pii]  
982 10.1016/j.cell.2005.10.023 (2005).
- 983 54 Reyskens, K. M. & Arthur, J. S. Emerging Roles of the Mitogen and Stress Activated  
984 Kinases MSK1 and MSK2. *Front Cell Dev Biol* **4**, 56, doi:10.3389/fcell.2016.00056  
985 (2016).
- 986 55 Hammond, C. M., Stromme, C. B., Huang, H., Patel, D. J. & Groth, A. Histone  
987 chaperone networks shaping chromatin function. *Nat Rev Mol Cell Biol* **18**, 141-158,  
988 doi:10.1038/nrm.2016.159 (2017).
- 989 56 Wagner, E. J. & Carpenter, P. B. Understanding the language of Lys36 methylation at  
990 histone H3. *Nat Rev Mol Cell Biol* **13**, 115-126, doi:10.1038/nrm3274 (2012).

- 991 57 McKay, D. J. *et al.* Interrogating the function of metazoan histones using engineered  
992 gene clusters. *Dev Cell* **32**, 373-386, doi:10.1016/j.devcel.2014.12.025 (2015).
- 993 58 Meers, M. P. *et al.* Histone gene replacement reveals a post-transcriptional role for  
994 H3K36 in maintaining metazoan transcriptome fidelity. *Elife* **6**,  
995 doi:10.7554/eLife.23249 (2017).
- 996 59 Zhang, Y. *et al.* Expression in aneuploid Drosophila S2 cells. *PLoS Biol* **8**, e1000320,  
997 doi:10.1371/journal.pbio.1000320 (2010).
- 998 60 Lee, H. *et al.* DNA copy number evolution in Drosophila cell lines. *Genome Biol* **15**,  
999 R70, doi:10.1186/gb-2014-15-8-r70 (2014).
- 1000 61 Castellano-Pozo, M. *et al.* R loops are linked to histone H3 S10 phosphorylation and  
1001 chromatin condensation. *Mol Cell* **52**, 583-590, doi:10.1016/j.molcel.2013.10.006  
1002 (2013).
- 1003 62 Garcia-Pichardo, D. *et al.* Histone Mutants Separate R Loop Formation from Genome  
1004 Instability Induction. *Mol Cell* **66**, 597-609.e595, doi:10.1016/j.molcel.2017.05.014  
1005 (2017).
- 1006 63 Bayona-Feliu, A., Casas-Lamesa, A., Reina, O., Bernues, J. & Azorin, F. Linker  
1007 histone H1 prevents R-loop accumulation and genome instability in heterochromatin.  
1008 *Nat Commun* **8**, 283, doi:10.1038/s41467-017-00338-5 (2017).
- 1009 64 Deng, H. *et al.* Ectopic histone H3S10 phosphorylation causes chromatin structure  
1010 remodeling in Drosophila. *Development* **135**, 699-705, doi:dev.015362 [pii]  
1011 10.1242/dev.015362 (2008).
- 1012 65 Fry, C. J., Shogren-Knaak, M. A. & Peterson, C. L. Histone H3 amino-terminal tail  
1013 phosphorylation and acetylation: synergistic or independent transcriptional regulatory  
1014 marks? *Cold Spring Harb Symp Quant Biol* **69**, 219-226,  
1015 doi:10.1101/sqb.2004.69.219 (2004).
- 1016 66 Braude-Zolotarjova, T. Y., Kakpakov, V. T. & Schuppe, N. G. Male diploid embryonic  
1017 cell line of Drosophila virilis. *In Vitro Cellular & Developmental Biology* **22**, 481-484,  
1018 doi:10.1007/bf02623449 (1986).
- 1019 67 Morales, V., Regnard, C., Izzo, A., Vetter, I. & Becker, P. B. The MRG domain  
1020 mediates the functional integration of MSL3 into the dosage compensation complex.  
1021 *Molecular and cellular biology* **25**, 5947-5954, doi:10.1128/MCB.25.14.5947-  
1022 5954.2005 (2005).
- 1023 68 Fauth, T., Muller-Planitz, F., Konig, C., Straub, T. & Becker, P. B. The DNA binding  
1024 CXC domain of MSL2 is required for faithful targeting the Dosage Compensation  
1025 Complex to the X chromosome. *Nucleic acids research* **38**, 3209-3221,  
1026 doi:10.1093/nar/gkq026 (2010).
- 1027 69 Punzeler, S. *et al.* Multivalent binding of PWWP2A to H2A.Z regulates mitosis and  
1028 neural crest differentiation. *Embo j* **36**, 2263-2279, doi:10.15252/embj.201695757  
1029 (2017).
- 1030 70 Bewley, G. C. Drosophila: A practical approach. Edited by D.B. Roberts Oxford-  
1031 Washington, DC: IRL Press, 1986. 295 pp. *Developmental Genetics* **8**, 59-60,  
1032 doi:10.1002/dvg.1020080108 (1987).
- 1033 71 Zhang, X. *et al.* Proteome-wide identification of ubiquitin interactions using UbiA-MS.  
1034 *Nat Protoc* **13**, 530-550, doi:10.1038/nprot.2017.147 (2018).
- 1035 72 Straub, T., Grimaud, C., Gilfillan, G. D., Mitterweger, A. & Becker, P. B. The  
1036 chromosomal high-affinity binding sites for the Drosophila dosage compensation  
1037 complex. *PLoS Genet* **4**, e1000302, doi:10.1371/journal.pgen.1000302 (2008).

- 1038 73 Cai, W., Jin, Y., Girton, J., Johansen, J. & Johansen, K. M. Preparation of Drosophila  
1039 polytene chromosome squashes for antibody labeling. *J Vis Exp*, doi:10.3791/1748  
1040 (2010).
- 1041 74 Li, Y. *et al.* Domain requirements of the JIL-1 tandem kinase for histone H3 serine 10  
1042 phosphorylation and chromatin remodeling in vivo. *J Biol Chem* **288**, 19441-19449,  
1043 doi:10.1074/jbc.M113.464271 (2013).
- 1044 75 Johansen, K. M. *et al.* Polytene chromosome squash methods for studying  
1045 transcription and epigenetic chromatin modification in Drosophila using antibodies.  
1046 *Methods* **48**, 387-397, doi:10.1016/j.ymeth.2009.02.019 (2009).
- 1047 76 Kamakaka, R. T. & Kadonaga, J. T. The soluble nuclear fraction, a highly efficient  
1048 transcription extract from Drosophila embryos. *Methods Cell Biol* **44**, 225-235 (1994).
- 1049 77 Cox, J. & Mann, M. MaxQuant enables high peptide identification rates, individualized  
1050 p.p.b.-range mass accuracies and proteome-wide protein quantification. *Nat*  
1051 *Biotechnol* **26**, 1367-1372, doi:10.1038/nbt.1511 (2008).
- 1052 78 Gatto, L. & Lilley, K. S. MSnbase-an R/Bioconductor package for isobaric tagged  
1053 mass spectrometry data visualization, processing and quantitation. *Bioinformatics* **28**,  
1054 288-289, doi:10.1093/bioinformatics/btr645 (2012).
- 1055 79 Thomas, P. D. *et al.* PANTHER: a library of protein families and subfamilies indexed  
1056 by function. *Genome research* **13**, 2129-2141, doi:10.1101/gr.772403 (2003).
- 1057 80 Mi, H. *et al.* PANTHER version 7: improved phylogenetic trees, orthologs and  
1058 collaboration with the Gene Ontology Consortium. *Nucleic Acids Res* **38**, D204-210,  
1059 doi:10.1093/nar/gkp1019 (2010).
- 1060 81 Shannon, P. *et al.* Cytoscape: a software environment for integrated models of  
1061 biomolecular interaction networks. *Genome research* **13**, 2498-2504,  
1062 doi:10.1101/gr.1239303 (2003).
- 1063 82 Szklarczyk, D. *et al.* STRING v10: protein-protein interaction networks, integrated  
1064 over the tree of life. *Nucleic Acids Res* **43**, D447-452, doi:10.1093/nar/gku1003  
1065 (2015).
- 1066 83 Wojcik, F. *et al.* Functional crosstalk between histone H2B ubiquitylation and H2A  
1067 modifications and variants. *Nat Commun* **9**, 1394, doi:10.1038/s41467-018-03895-5  
1068 (2018).
- 1069 84 Fierz, B. *et al.* Histone H2B ubiquitylation disrupts local and higher-order chromatin  
1070 compaction. *Nat Chem Biol* **7**, 113-119, doi:10.1038/nchembio.501 (2011).
- 1071 85 Debelouchina, G. T., Gerecht, K. & Muir, T. W. Ubiquitin utilizes an acidic surface  
1072 patch to alter chromatin structure. *Nat Chem Biol* **13**, 105-110,  
1073 doi:10.1038/nchembio.2235 (2017).
- 1074 86 Luger, K., Rechsteiner, T. J. & Richmond, T. J. in *Chromatin Protocols* (ed Peter B.  
1075 Becker) 1-16 (Humana Press, 1999).
- 1076 87 Schauer, T. *et al.* Chromosome topology guides the Drosophila Dosage  
1077 Compensation Complex for target gene activation. *EMBO Rep* **18**, 1854-1868,  
1078 doi:10.15252/embr.201744292 (2017).
- 1079 88 Bonte, E. & Becker, P. B. Preparation of chromatin assembly extracts from  
1080 preblastoderm Drosophila embryos. *Methods Mol Biol* **119**, 187-194, doi:1-59259-  
1081 681-9-187 [pii]  
1082 10.1385/1-59259-681-9:187 (1999).
- 1083 89 Li, H. *et al.* The Sequence Alignment/Map format and SAMtools. *Bioinformatics* **25**,  
1084 2078-2079, doi:10.1093/bioinformatics/btp352 (2009).

- 1085 90 Quinlan, A. R. & Hall, I. M. BEDTools: a flexible suite of utilities for comparing  
1086 genomic features. *Bioinformatics* **26**, 841-842, doi:10.1093/bioinformatics/btq033  
1087 (2010).
- 1088 91 Langmead, B., Trapnell, C., Pop, M. & Salzberg, S. L. Ultrafast and memory-efficient  
1089 alignment of short DNA sequences to the human genome. *Genome Biol* **10**, R25,  
1090 doi:10.1186/gb-2009-10-3-r25 (2009).
- 1091 92 Dobin, A. *et al.* STAR: ultrafast universal RNA-seq aligner. *Bioinformatics* **29**, 15-21,  
1092 doi:10.1093/bioinformatics/bts635 (2013).
- 1093 93 Li, B. & Dewey, C. N. RSEM: accurate transcript quantification from RNA-Seq data  
1094 with or without a reference genome. *BMC Bioinformatics* **12**, 323, doi:10.1186/1471-  
1095 2105-12-323 (2011).
- 1096 94 Love, M. I., Huber, W. & Anders, S. Moderated estimation of fold change and  
1097 dispersion for RNA-seq data with DESeq2. *Genome Biol* **15**, 550,  
1098 doi:10.1186/s13059-014-0550-8 (2014).
- 1099 95 Villa, R., Schauer, T., Smialowski, P., Straub, T. & Becker, P. B. PionX sites mark the  
1100 X chromosome for dosage compensation. *Nature* **537**, 244-248,  
1101 doi:10.1038/nature19338 (2016).
- 1102 96 Edgar, R., Domrachev, M. & Lash, A. E. Gene Expression Omnibus: NCBI gene  
1103 expression and hybridization array data repository. *Nucleic acids research* **30**, 207-  
1104 210, doi:10.1093/nar/30.1.207 (2002).
- 1105 97 Deutsch, E. W. *et al.* The ProteomeXchange consortium in 2017: supporting the  
1106 cultural change in proteomics public data deposition. *Nucleic Acids Res* **45**, D1100-  
1107 D1106, doi:10.1093/nar/gkw936 (2017).
- 1108
- 1109

Figure 1 - Albig et al.

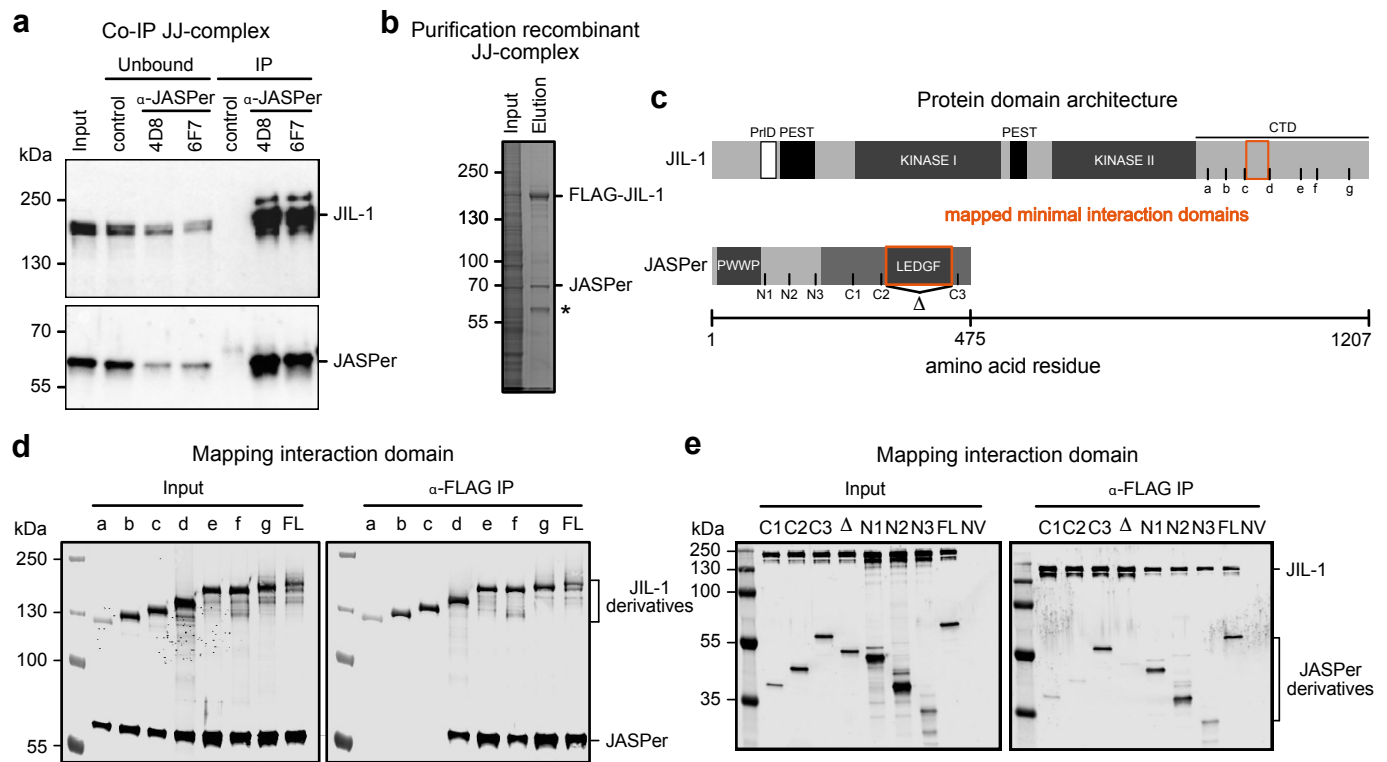

1110 **Figure 1. JIL-1's C-terminal domain interacts with JASPer's LEDGF domain to form the**  
1111 **JJ-complex.**

1112 (a) Western blot analysis with  $\alpha$ -JASPer and  $\alpha$ -JIL-1 antibodies of co-IP from nuclear embryo  
1113 extracts. Co-IP was performed with two different monoclonal  $\alpha$ -JASPer antibodies containing  
1114 culture supernatants and culture medium as control. The corresponding unbound fractions  
1115 are loaded next to each IP. Molecular weight markers are shown to the left.

1116 (b) SDS-PAGE with Coomassie staining of recombinant JJ-complex purification from Sf21  
1117 cells using a baculovirus dual expression system with FLAG-JIL-1 and untagged JASPer.  
1118 Molecular weight markers are shown to the left and antibody heavy chain is marked by  
1119 asterisk.

1120 (c) JIL-1 and JASPer domain architecture drawn to scale. In JIL-1, PEST domains are  
1121 highlighted in black, kinase domains in dark grey and a predicted prion-like domain in white.  
1122 In JASPer, PWWP and LEDGF domains are highlighted in dark grey and conserved region in  
1123 intermediate grey. Truncation breakpoints a-g for JIL-1 and N1-C3 for JASPer used in (d)  
1124 and (e) are indicated.  $\Delta$  denotes the deletion in JASPer- $\Delta$ LEDGF.

1125 (d) Western blot analysis using  $\alpha$ -FLAG antibody of co-IP experiments with extracts from  
1126 Sf21 cells expressing wild type, untagged JASPer and various FLAG-JIL-1 C-terminal  
1127 deletion mutants. Co-IP was performed with  $\alpha$ -FLAG beads.

1128 (e) Western blot analysis using  $\alpha$ -FLAG antibody of co-IP experiments with extracts from  
1129 Sf21 cells expressing various untagged JASPer deletion mutants and FLAG-JIL-1.  
1130 Uninfected Sf21 cell extract was used as control (NV = no virus). Co-IP was performed with  
1131  $\alpha$ -FLAG beads.

1132



Figure 2 - Albig et al.

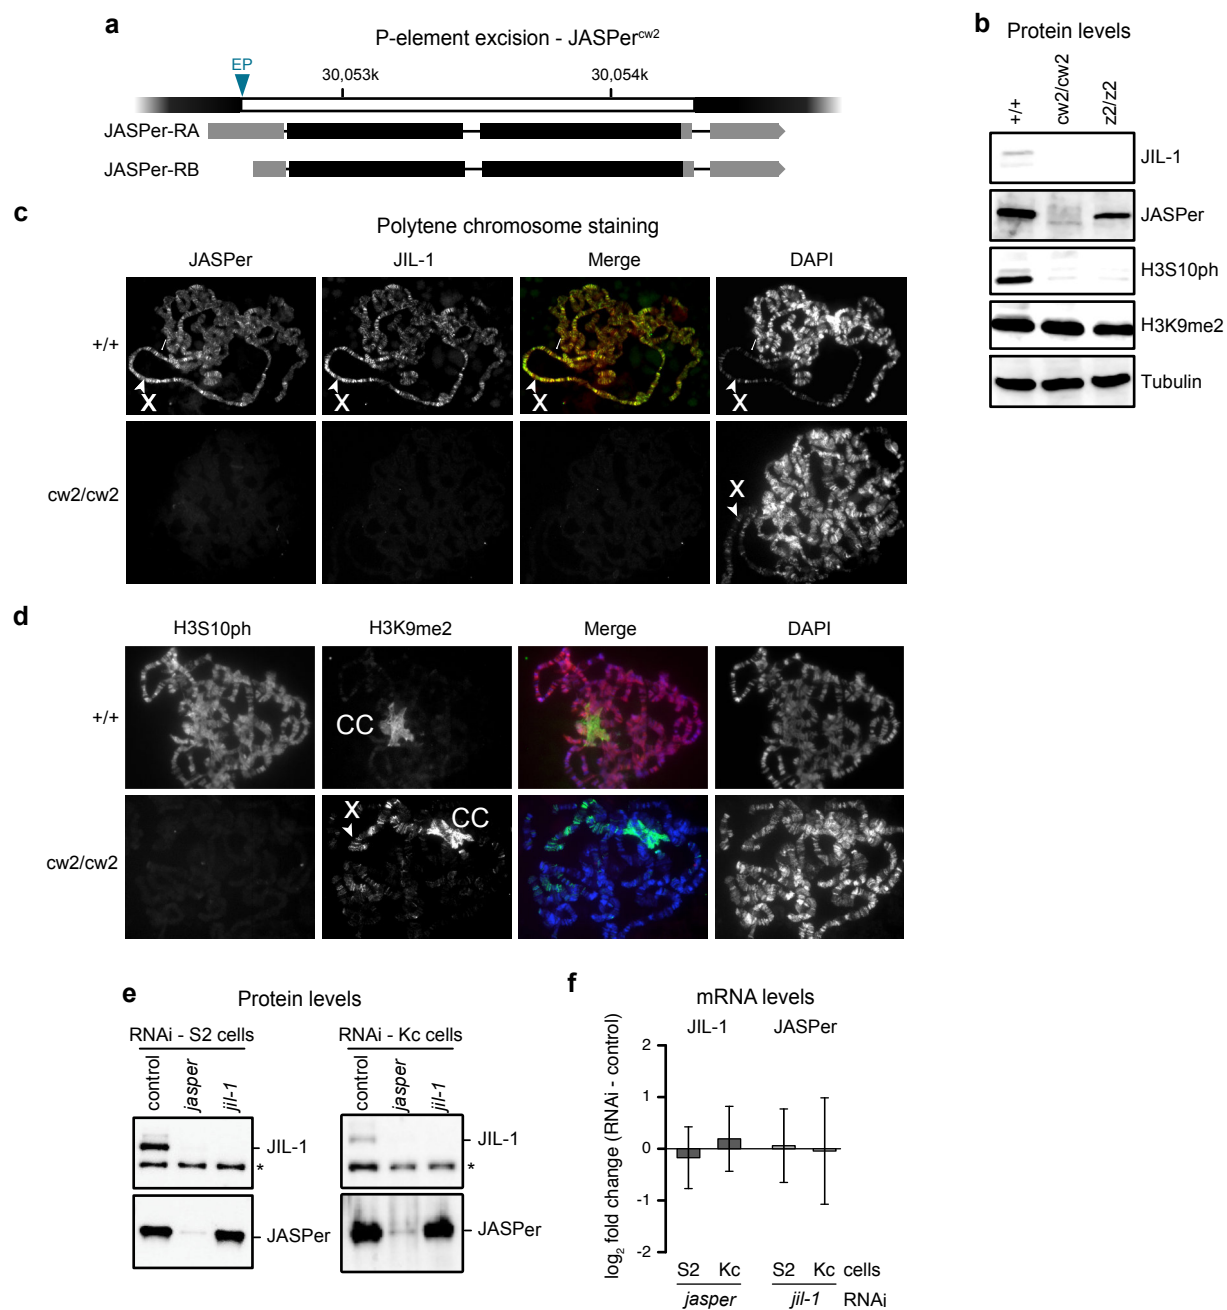

1133 **Figure 2. JIL-1 is unstable in absence of JASPer in the JASPer<sup>cw2/cw2</sup> mutant and in cell**  
1134 **lines.**

1135 (a) Gene model for P-element excision in the JASPer locus to generate JASPer<sup>cw2</sup> allele. The  
1136 mRNA isoforms RA and RB are shown below. The excised genomic portion is marked in  
1137 white and EP denotes the position of the excised P-element in EP-element line GS3268.

1138 (b) Western blot analysis of salivary gland extracts from L3 larvae of homozygous  
1139 JASPer<sup>cw2/cw2</sup> and JIL-1<sup>z2/z2</sup> mutants and wild type larvae as control. Western blots using  $\alpha$ -  
1140 JIL-1,  $\alpha$ -JASPer,  $\alpha$ -H3S10ph and  $\alpha$ -H3K9me2 antibodies are shown, western blot with  $\alpha$ -  
1141 tubulin antibody was used as loading control.

1142 (c) Immunofluorescence microscopy of polytene chromosome squashes from L3 larvae of  
1143 homozygous JASPer<sup>cw2/cw2</sup> and wild type larvae as control. From left to right, staining for  
1144 JASPer, JIL-1, merged images and DNA are shown. The X chromosome is marked by arrow  
1145 heads.

1146 (d) Immunofluorescence microscopy of polytene chromosome spreads from L3 larvae of  
1147 homozygous JASPer<sup>cw2/cw2</sup> and wild type larvae as control. From left to right, staining for  
1148 H3S10ph, H3K9me2, merged images and DNA are shown. The X chromosome is marked by  
1149 arrow head and the chromocenter is labelled with "CC".

1150 (e) Representative Western blot analysis using  $\alpha$ -JASPer and  $\alpha$ -JIL-1 antibodies of cell  
1151 extracts from S2 cells (left panel) and Kc cells (right panel) after *jasper* or *jil-1* RNAi  
1152 treatment, as used for RNA-seq experiments.

1153 (f) Bar chart showing mean log<sub>2</sub> fold-change of normalized mean RNA-seq counts for JIL-1  
1154 and JASPer. Left panel, JIL-1 mean log<sub>2</sub> fold-change upon *jasper* RNAi (S2 n = 4 and Kc n =  
1155 4). Right panel, JASPer mean log<sub>2</sub> fold-change upon *jil-1* RNAi (S2 n = 5 and Kc n = 4). Error  
1156 bars represent standard error of the mean.

1157

1158

Figure 3 - Albig et al.

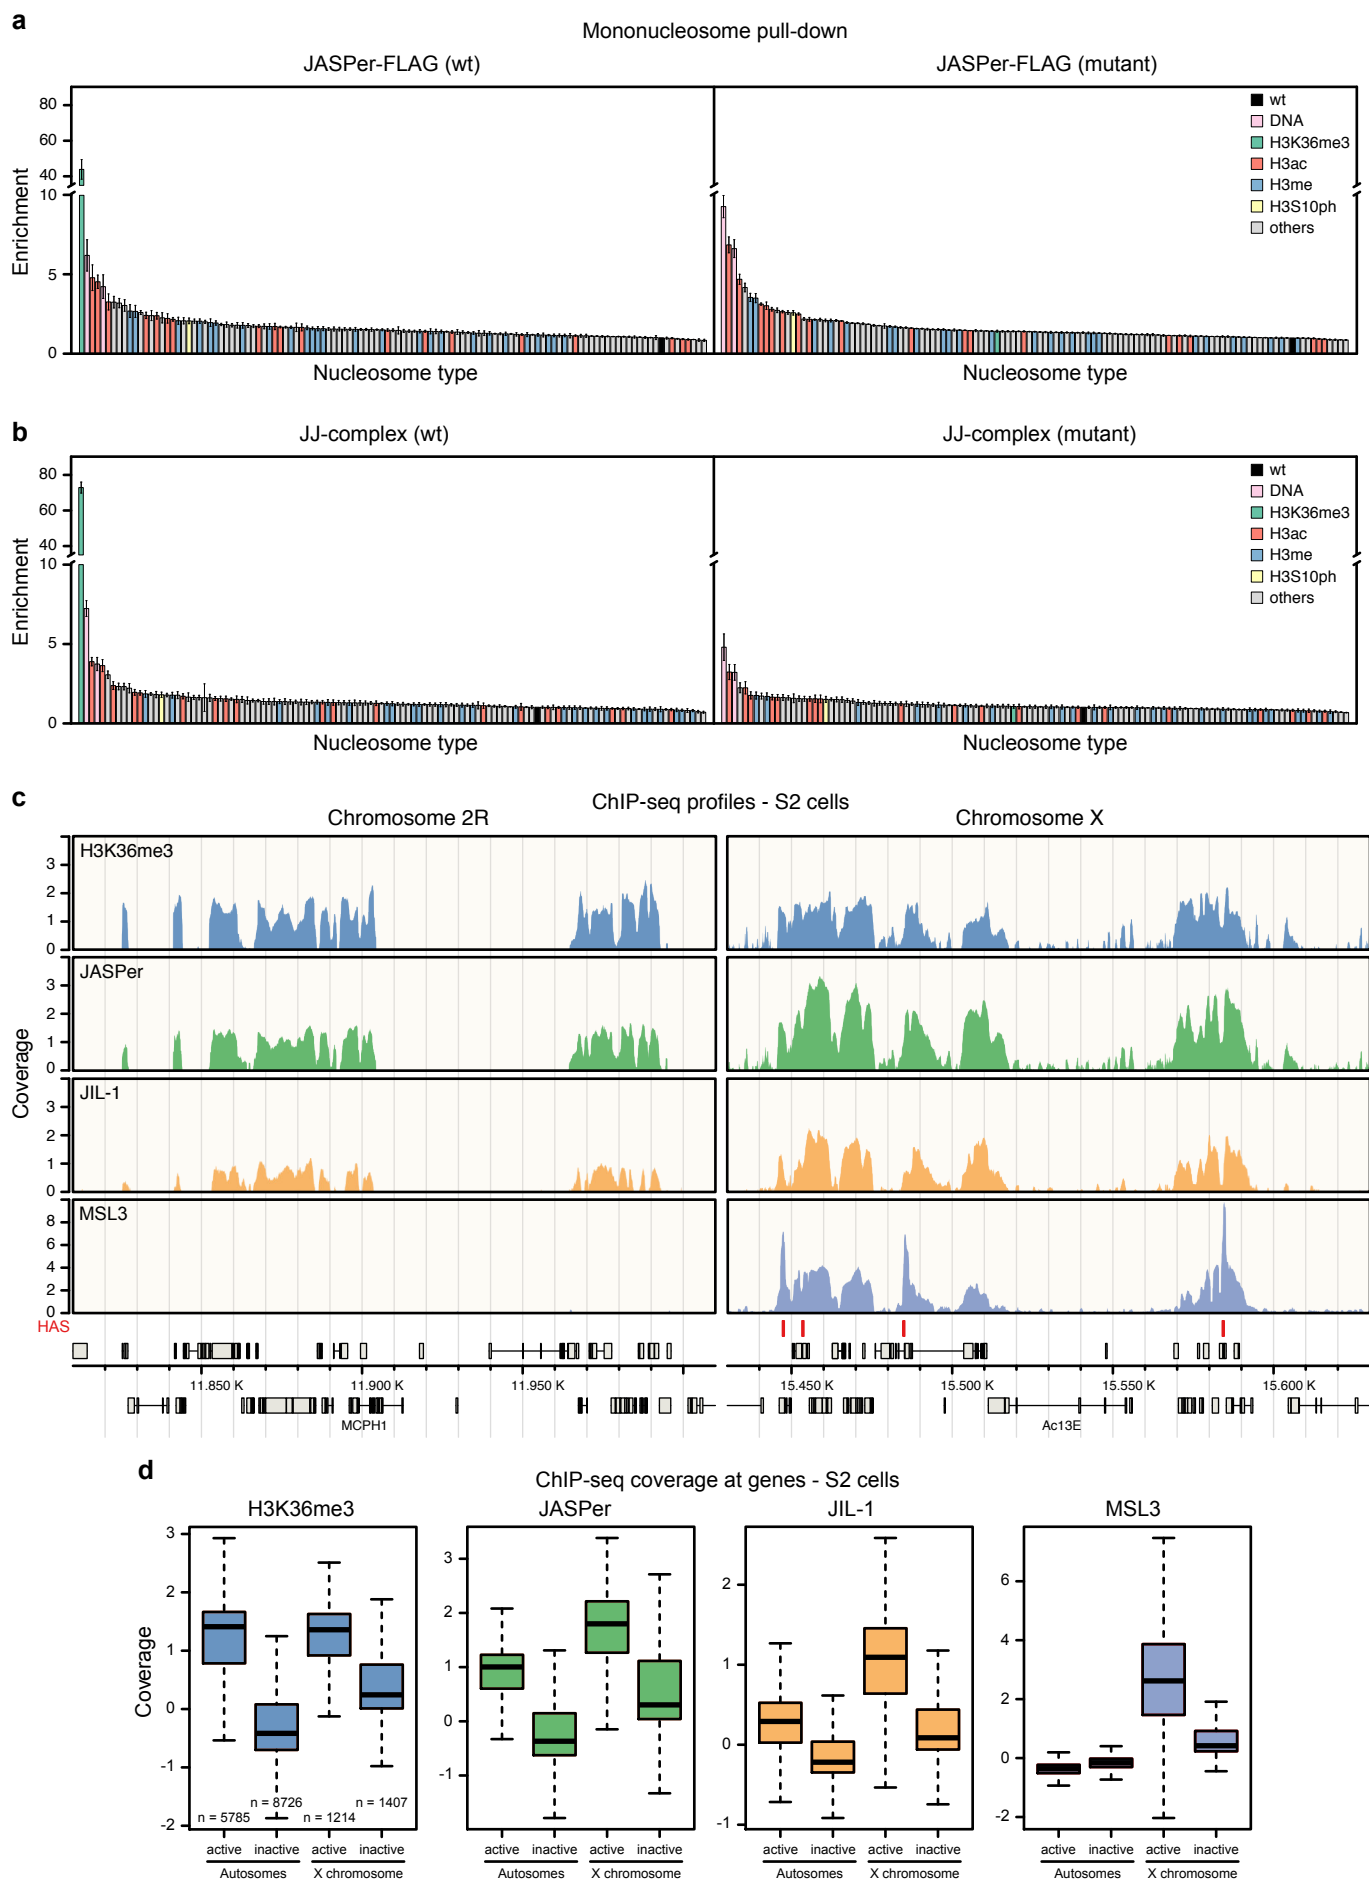

1159 **Figure 3. The JJ-complex binds H3K36me3 nucleosomes *in vitro* and *in vivo*, and is**  
1160 **enriched on the male X chromosome.**

1161 (a) Bar chart of mean enrichment (n = 3) of nucleosome library pull-down with JASPer-FLAG  
1162 (left panel) and aromatic cage mutant (right panel) relative to unmodified nucleosome, which  
1163 is set to 1. Error bars represent standard error of the mean.

1164 (b) Bar chart of mean enrichment (n = 3) of nucleosome library pull-down with JJ-complex  
1165 (FLAG-JIL-1 and untagged JASPer) (left panel) and aromatic cage mutant (right panel)  
1166 relative to unmodified nucleosome, which is set to 1, as in (a). Error bars represent standard  
1167 error of the mean.

1168 (c) Genome browser profile showing mean H3K36me3 (upper panel, n = 4), JASPer (second  
1169 upper panel, n = 4), JIL-1 (second lower panel, n = 5) and MSL3 (lower panel, n = 3) MNase  
1170 ChIP-seq normalized coverage along representative 200 kb windows on chromosome 2R  
1171 and X in male S2 cells. HAS are marked by red bars above the gene models in grey.

1172 (d) Box plot showing mean H3K36me3 (left panel, n = 4), JASPer (second left panel, n = 4),  
1173 JIL-1 (second right, n = 5) and MSL3 (right, n = 3) MNase ChIP-seq normalized coverage, as  
1174 in (c), at active (tpm > 1) and inactive (tpm ≤ 1) genes on the autosomes (n = 5785 and n =  
1175 8726, respectively) and X chromosome (n = 1214 and n = 1407, respectively) in male S2  
1176 cells. Outliers are not shown.

1177

1178

Figure 4 - Albig et al.

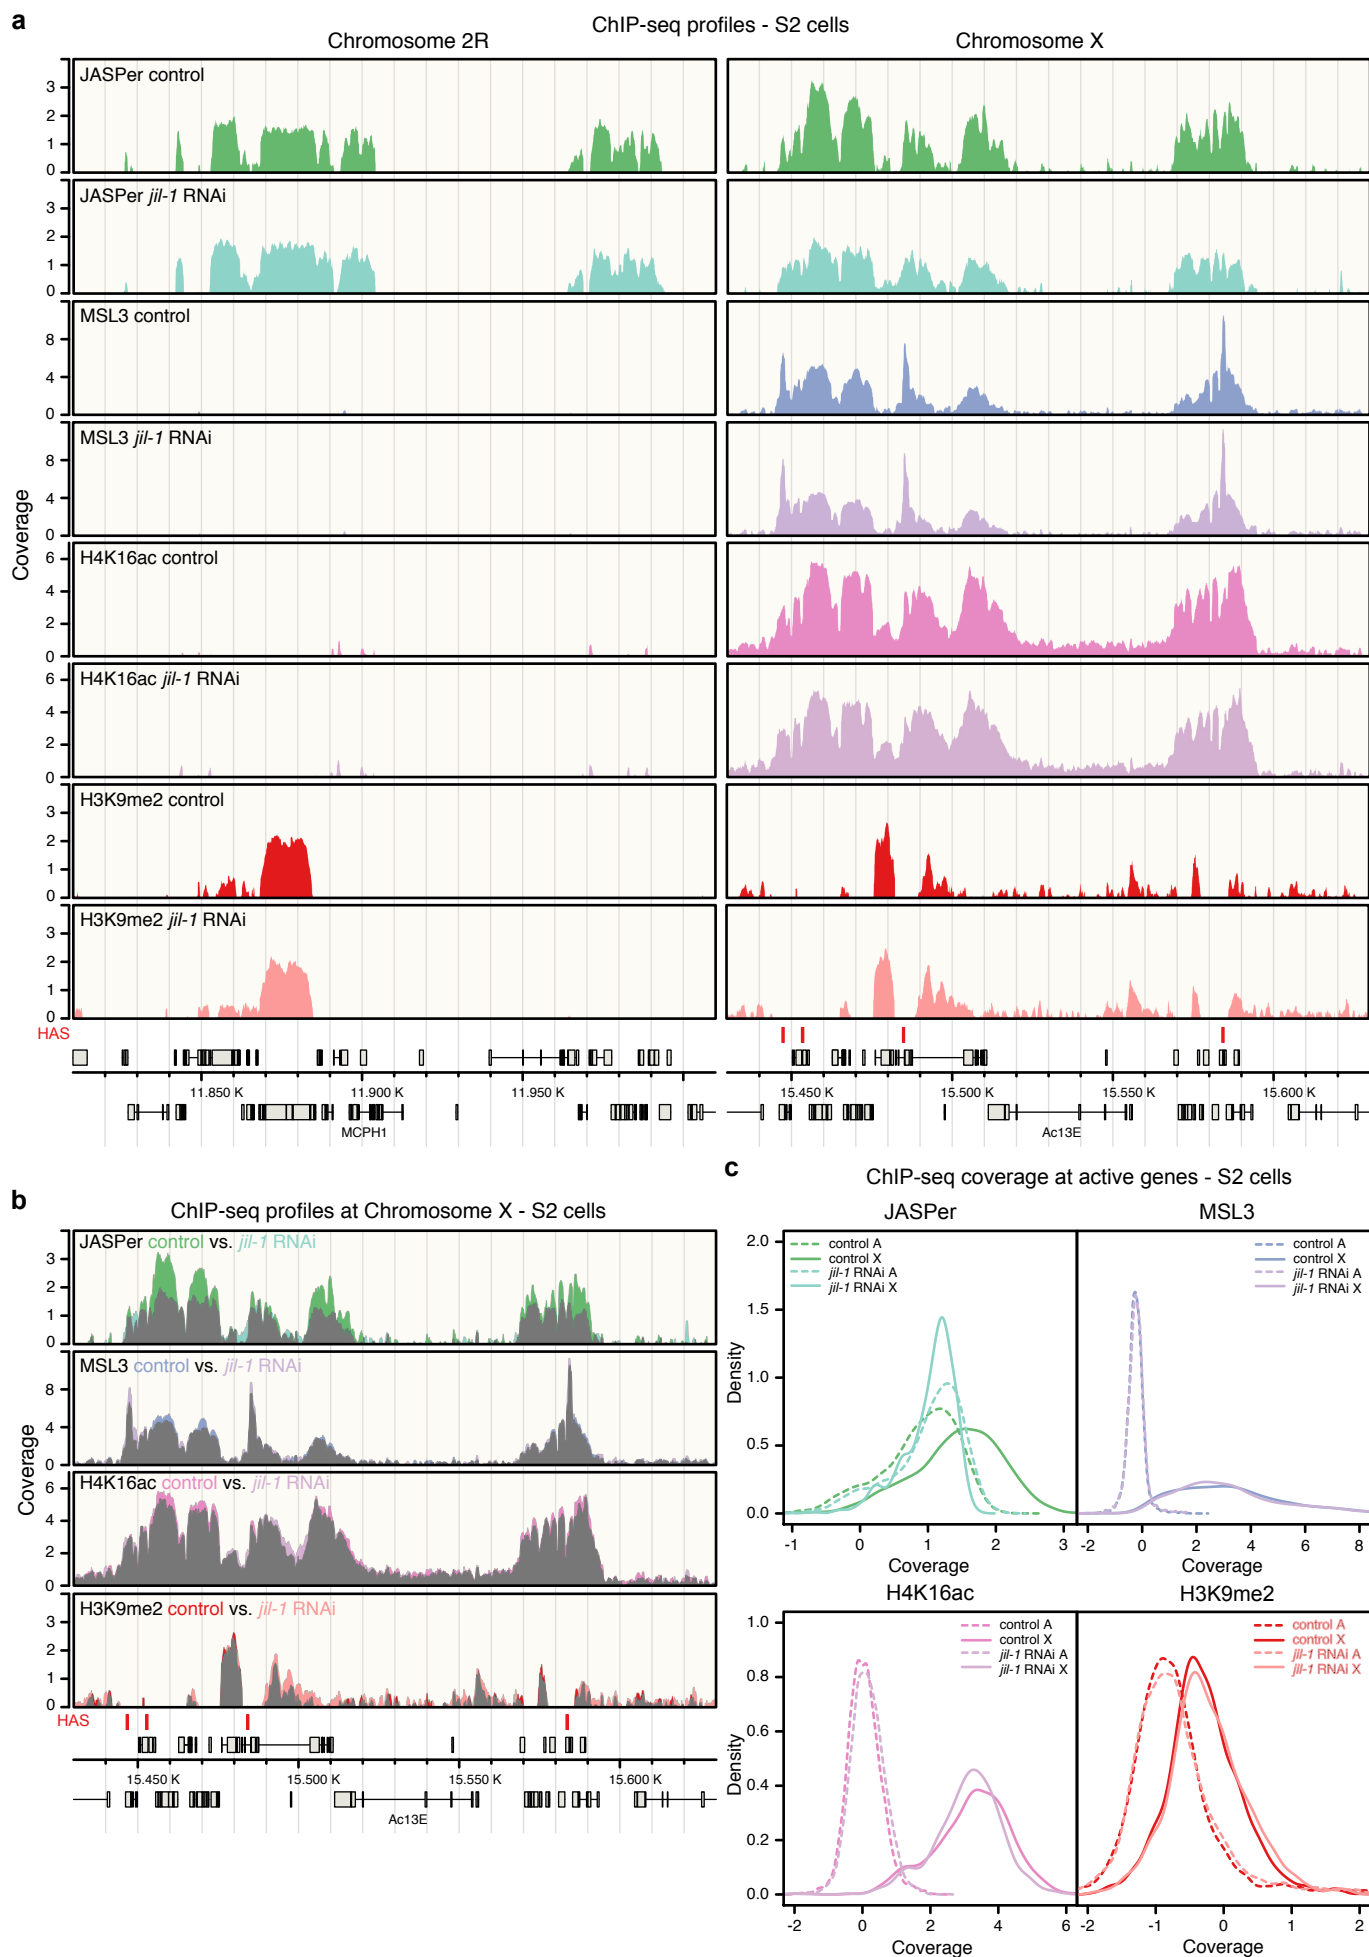

1179 **Figure 4. JIL-1 and not H4K16ac is responsible for the enrichment of JASPer at the**  
1180 **male X chromosome.**

1181 (a) Genome browser profile showing mean (n = 3, for MSL3 n = 2) spike-in ChIP-seq  
1182 normalized coverage in control male S2 cells and after *jil-1* RNAi treatment from top to  
1183 bottom for JASPer, MSL3, H4K16ac and H3K9me2 along representative 200 kb windows on  
1184 chromosome 2R and X. HAS are marked by red bars above the gene models in grey.

1185 (b) Genome browser profile as in (a) showing mean (n = 3, for MSL3 n = 2) spike-in ChIP-  
1186 seq normalized coverage in control male S2 cells and after *jil-1* RNAi treatment as overlay  
1187 marked in grey, from top to bottom for JASPer, MSL3, H4K16ac and H3K9me2 along a  
1188 representative 200 kb window on chromosome X.

1189 (c) Density plot showing mean (n = 3, for MSL3 n = 2) spike-in ChIP-seq normalized  
1190 coverage in control male S2 cells and after *jil-1* RNAi treatment at active (tpm > 1) genes for  
1191 JASPer (top left), MSL3 (top right), H4K16ac (bottom left) and H3K9me2 (bottom right). X  
1192 chromosomal genes (n = 1214) are marked with solid line and autosomal genes  
1193 (chromosomes 2L, 2R, 3L and 3R, n = 5785) with dashed line.

1194

1195

Figure 5 - Albig et al.

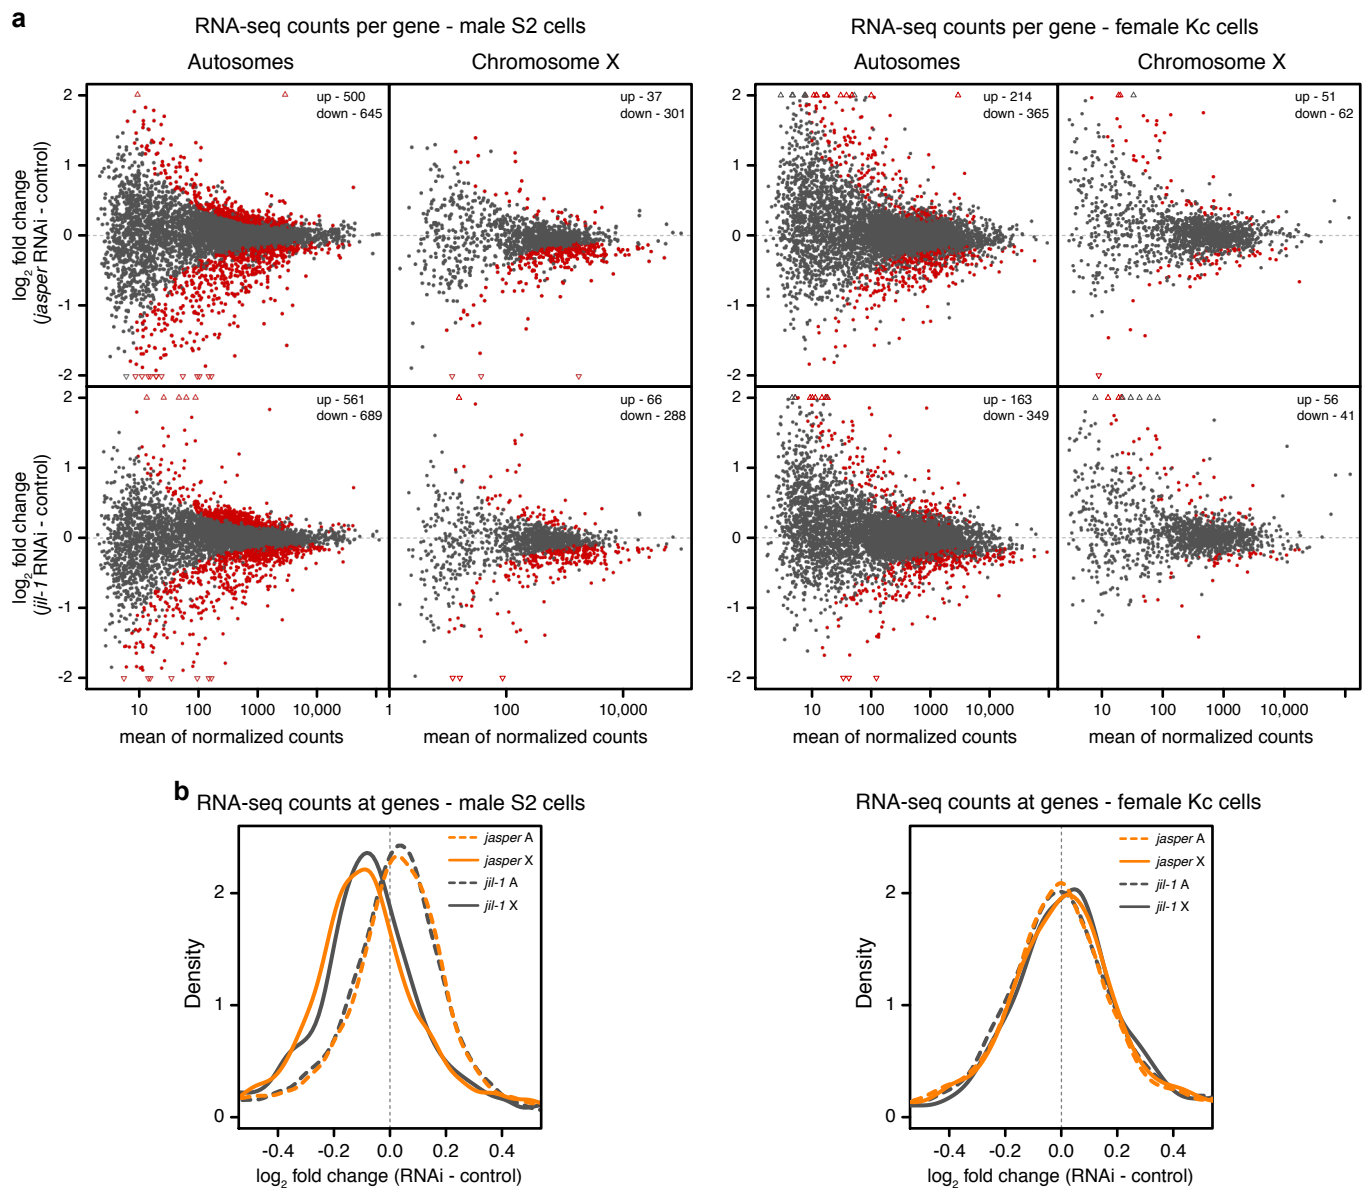

1196 **Figure 5. JIL-1 and JASPer depletion in cells modulates the transcriptional output of**  
1197 **genes, especially on the male X chromosome.**

1198 (a) MA-plot showing mean  $\log_2$  fold-change of RNA-seq counts upon *jasper* RNAi versus  
1199 control (upper panel, n = 4) and *jil-1* RNAi versus controls (lower panel, n = 5) against mean  
1200 RNA-seq counts for robustly detected genes at autosomes (left, chromosomes 2L, 2R, 3L  
1201 and 3R n = 6833) and X chromosome (right, n = 1441) in male S2 cells (left site). Statistically  
1202 significant differentially expressed genes between RNAi and control conditions (fdr < 0.05)  
1203 are marked in red and the number of significant genes is indicated on the plot. On the right,  
1204 mean  $\log_2$  fold-change of RNA-seq counts upon *jasper* RNAi versus control (upper panel, n =  
1205 4) and *jil-1* RNAi versus controls (lower panel, n = 4) against mean RNA-seq counts for  
1206 autosomal genes (left, chromosomes 2L, 2R, 3L and 3R n = 7144) and X chromosomal  
1207 genes (right, n = 1509) in female Kc cells (left site).

1208 (b) Density plot showing mean  $\log_2$  fold-change of RNA-seq counts upon *jasper* RNAi versus  
1209 controls (n = 4) and *jil-1* RNAi versus controls (n = 5) at genes in male S2 cells, in left panel,  
1210 as in (a). X chromosomal genes (n = 1441) are marked with solid line and autosomal genes  
1211 (chromosomes 2L, 2R, 3L and 3R, n = 6833) with dashed line and *jasper* RNAi additionally in  
1212 orange. Right panel, mean  $\log_2$  fold-change of RNA-seq counts upon *jasper* RNAi and *jil-1*  
1213 RNAi versus controls (n = 4 each) at genes in female Kc cells. X chromosomal genes (n =  
1214 1509) and autosomal genes (chromosomes 2L, 2R, 3L and 3R, n = 7144).

1215

1216



Figure 6 - Albig et al.

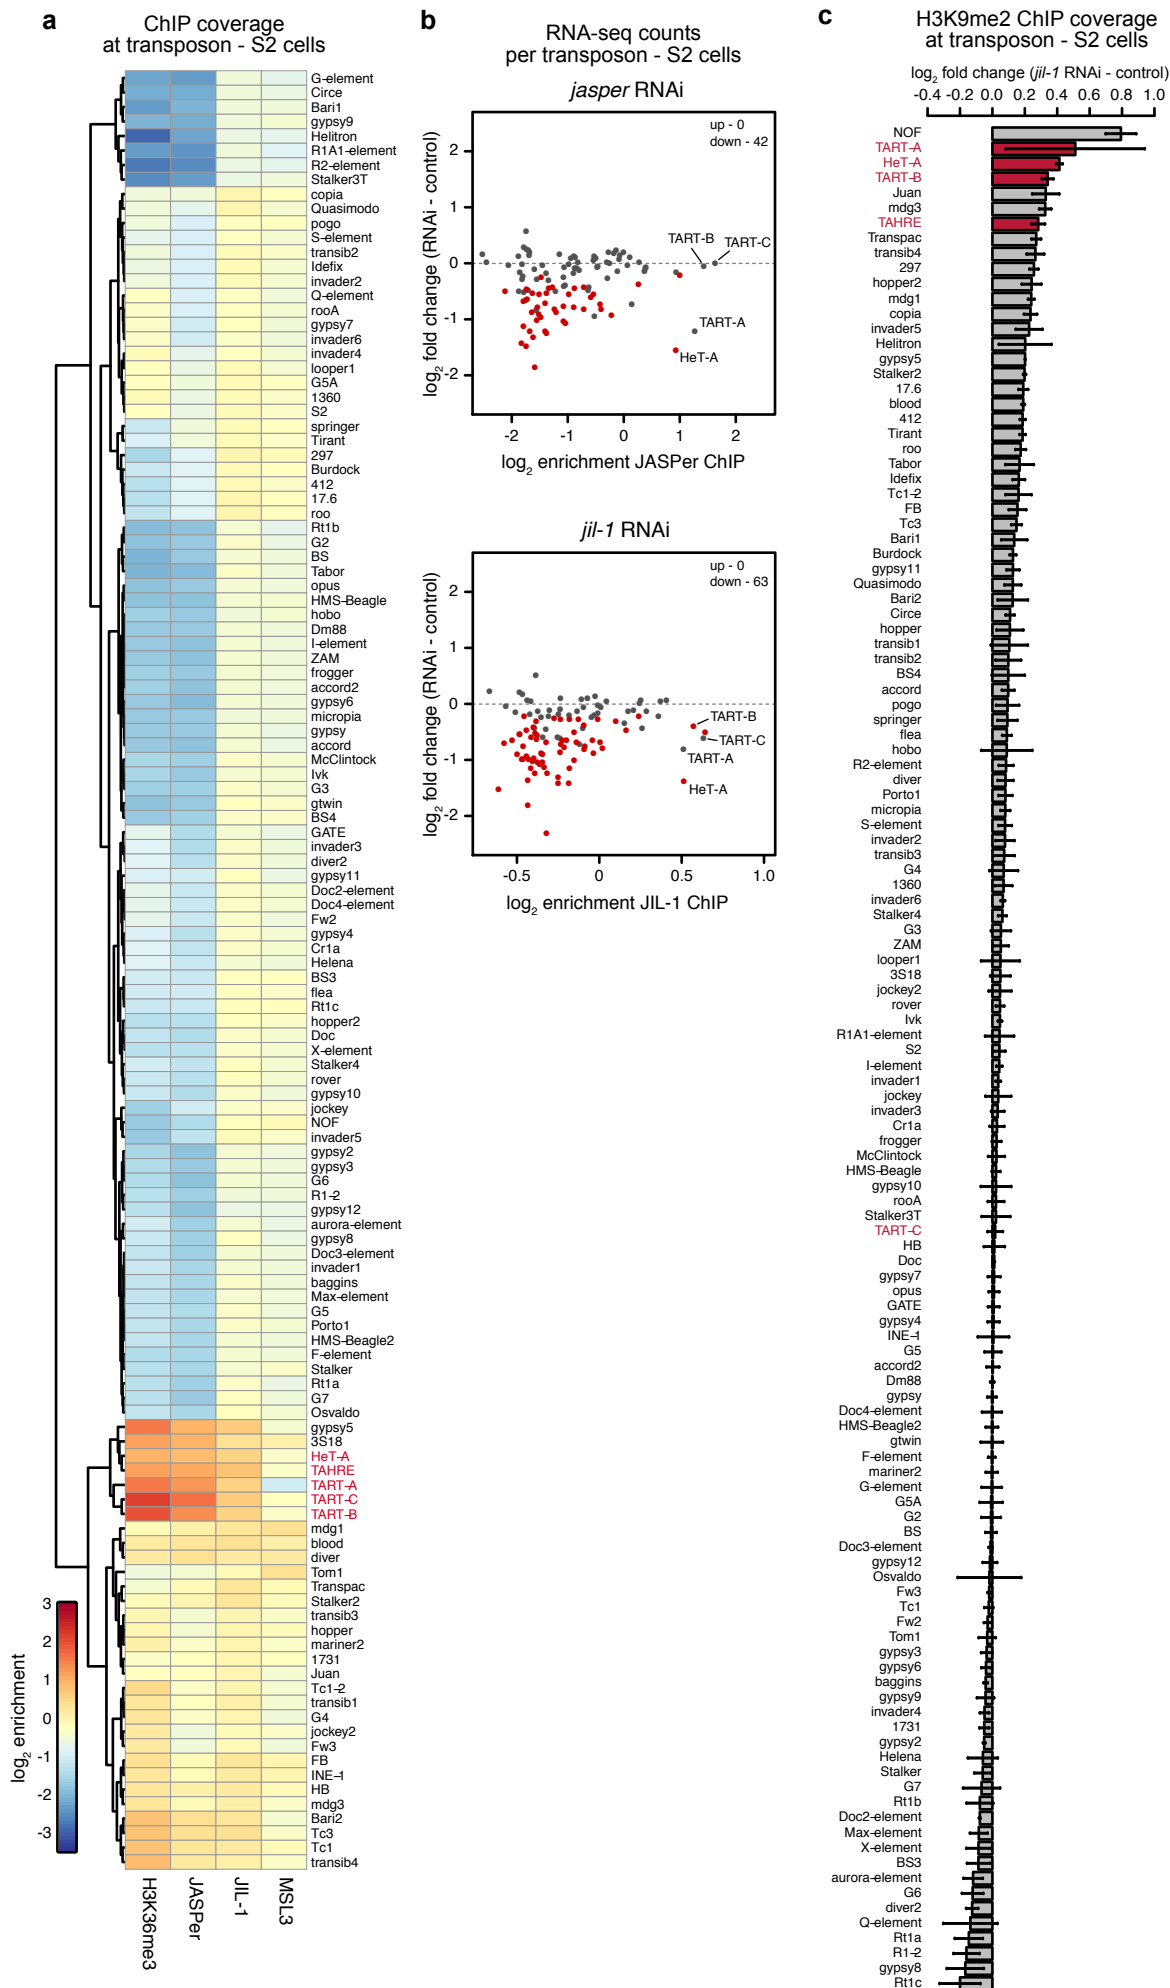

1217 **Figure 6. JIL-1 and JASPer depletion in S2 cells decrease the transcript level of**  
1218 **transposons of the telomeric transposons of the HTT arrays.**

1219 (a) Heatmap showing mean normalized  $\log_2$  enrichment in H3K36me3 (n = 4), JASPer (n =  
1220 4), JIL-1 (n = 5) and MSL3 (n = 3) MNase ChIP-seq at transposons (n = 124) in male S2  
1221 cells. Transposons of the HTT array are marked in red.

1222 (b) Scatter plot showing mean  $\log_2$  fold-change of RNA-seq counts upon *jasper* RNAi versus  
1223 control (left panel, n = 4) and *jil-1* RNAi versus control (right panel, n = 5) against mean  
1224 normalized  $\log_2$  enrichment in JASPer (n = 4, upper panel) and JIL-1 (n = 5, lower panel)  
1225 MNase ChIP-seq, respectively, at robustly detected transposons in male S2 cells (n = 111).  
1226 Statistically significant differentially expressed transposons between RNAi and control  
1227 conditions (fdr < 0.05) are marked in red and the number of significant genes is indicated on  
1228 the plot.

1229 (c) Bar plot of difference of mean H3K9me2 (n = 3 each) spike-in ChIP-seq normalized  
1230 coverage after *jil-1* RNAi treatment and control male S2 cells at transposons (n = 124) in  
1231 male S2 cells. Error bars represent standard error of the mean. TEs of the HTT arrays are  
1232 marked in red.

1233

1234

Figure 7 - Albig et al.

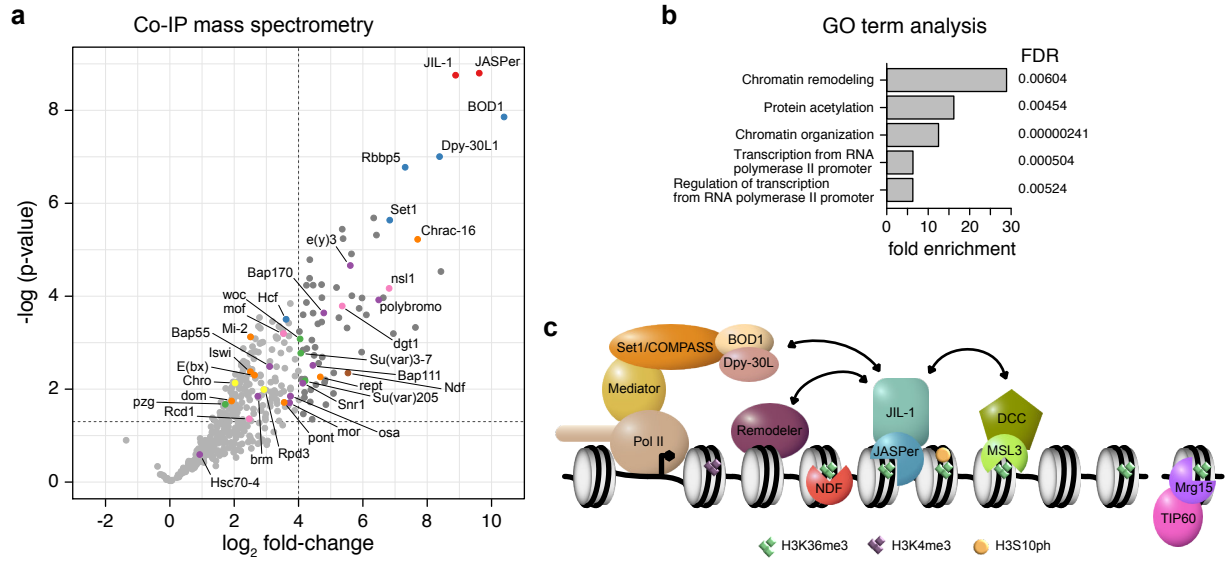

1235 **Figure 7. The JJ-complex interaction network and other H3K36me3 binding complexes**  
1236 **in *Drosophila melanogaster*.**

1237 (a) Volcano plot of IP-MS showing  $-\log_{10}(\text{p-values})$  against mean  $\log_2$  fold-change in  $\alpha$ -  
1238 JASPer IP (n = 6) versus control IP (n = 5). Significantly enriched (p-value < 0.05 and  $\log_2$   
1239 fold-change > 4) proteins (n = 69) are highlighted in dark grey. JIL-1 and JASPer are marked  
1240 in red, Set1/COMPASS complex members in blue, PBAP/Brm complex members in purple,  
1241 chromatin remodelers in orange, NSL complex members in pink, Su(var)3-7, Su(var)205,  
1242 woc and pzg in green, Chro and Rpd3 in yellow and NDF in brown.

1243 (b) Bar plot showing GO term enrichment of significantly enriched proteins as in (d). The five  
1244 statistically significantly (fdr < 0.01) most enriched GO terms are shown.

1245 (c) Model of JJ-complex binding at H3K36me3 marked gene bodies and its interaction with  
1246 other complexes. Interactions presented here are indicated by arrows. Other known  
1247 H3K36me3 binding proteins with PWWP domain (NDF and Mrg15) are drawn at the lower  
1248 side.
